# Supplementary material for: Simple 1-dicyanomethylene-2-chloro-3-aminoindene push–pull chromophores: applications in cation and anion sensing
Source: Royal Society of Chemistry journal article supplement (doi:10.1039/b916700e), 2009-11-28
Supplement: b916700e.pdf [file b916700e.pdf]

## Electronic Supplementary Information

### Simple 1-dicyanomethylene-2-chloro-3-aminoindene push-pull chromophores: applications in cation and anion sensing

Sara Basurto,<sup>a</sup> Daniel Miguel,<sup>b</sup> Daniel Moreno,<sup>a</sup> Ana G. Neo,<sup>c</sup> Roberto Quesada,<sup>a</sup> Tomás Torroba\*<sup>a</sup>

<sup>a</sup> Departamento de Química, Facultad de Ciencias, Universidad de Burgos, Plaza Misael Bañuelos s/n, 09001 Burgos, Spain. Fax: 34 947 258831; Tel: 34 947 258088; E-mail: ttorroba@ubu.es

<sup>b</sup> Departamento de Química Física y Química Inorgánica, Facultad de Ciencias, Universidad de Valladolid, 47011 Valladolid, Spain. Fax: 34 983 423234; Tel: 34 983 184096; E-mail: dmsj@qi.uva.es

<sup>c</sup> Departamento de Química Orgánica, Facultad de Veterinaria, Universidad de Extremadura, Avenida de la Universidad s/n, 10071 Cáceres, Spain. Fax: 34 927 257110; Tel: 34 927 257158; E-mail: aneo@unex.es

#### Contents:

1. Crystal Structure determination for compound 3
2. NMR and UV spectra of compounds 2-10
3. Titration Materials and Methods
4. Colorimetric Studies
5. Reversibility studies
6. <sup>1</sup>H NMR Titration Studies
7. Kinetic studies

**1. Crystal Structure determination for compound 3** A single crystal of **3** was mounted on a glass fibre. X-ray measurements were made using a Bruker SMART CCD area-detector diffractometer with Mo-K $\alpha$  radiation ( $\lambda = 0.71073 \text{ \AA}$ ).<sup>1a</sup> Intensities were integrated<sup>1b</sup> from several series of exposures, each exposure covering  $0.3^\circ$  in  $\omega$ , and the total data set being a sphere. Absorption corrections were applied, based on multiple and symmetry-equivalent measurements.<sup>1c</sup> The structure was solved by direct methods and refined by least squares on weighted  $F^2$  values for all reflections.<sup>1d</sup> All non-hydrogen atoms were assigned anisotropic displacement parameters and refined without positional constraints. All hydrogen atoms were constrained to ideal geometries and refined with fixed isotropic displacement parameters. Refinement proceeded smoothly to give the residuals. Complex neutral-atom scattering factors were used.<sup>1e</sup>

**Table 1.** Crystal data and structure refinement for **3**.

|                                 |                                                   |                               |
|---------------------------------|---------------------------------------------------|-------------------------------|
| Identification code             | neo163am                                          |                               |
| Empirical formula               | C <sub>20</sub> H <sub>22</sub> Cl N <sub>3</sub> |                               |
| Formula weight                  | 339.86                                            |                               |
| Temperature                     | 293(2) K                                          |                               |
| Wavelength                      | 0.71073 Å                                         |                               |
| Crystal system                  | Triclinic                                         |                               |
| Space group                     | P-1                                               |                               |
| Unit cell dimensions            | a = 8.3304(16) Å                                  | $\alpha = 92.955(4)^\circ$ .  |
|                                 | b = 9.1897(18) Å                                  | $\beta = 97.382(4)^\circ$ .   |
|                                 | c = 13.096(3) Å                                   | $\gamma = 108.536(4)^\circ$ . |
| Volume                          | 938.1(3) Å <sup>3</sup>                           |                               |
| Z                               | 2                                                 |                               |
| Density (calculated)            | 1.203 Mg/m <sup>3</sup>                           |                               |
| Absorption coefficient          | 0.209 mm <sup>-1</sup>                            |                               |
| F(000)                          | 360                                               |                               |
| Crystal size                    | 0.31 x 0.13 x 0.09 mm <sup>3</sup>                |                               |
| Theta range for data collection | 1.58 to 23.33°.                                   |                               |
| Index ranges                    | -9<=h<=9, -10<=k<=8, -14<=l<=12                   |                               |
| Reflections collected           | 4227                                              |                               |
| Independent reflections         | 2673 [R(int) = 0.0248]                            |                               |
| Completeness to theta = 23.33°  | 98.3 %                                            |                               |
| Absorption correction           | Semi-empirical from equivalents                   |                               |
| Max. and min. transmission      | 1.000000 and 0.627933                             |                               |

|                                      |                                              |
|--------------------------------------|----------------------------------------------|
| Refinement method                    | Full-matrix least-squares on $F^2$           |
| Data / restraints / parameters       | 2673 / 0 / 221                               |
| Goodness-of-fit on $F^2$             | 1.038                                        |
| Final R indices [ $I > 2\sigma(I)$ ] | $R_1 = 0.0635$ , $wR_2 = 0.1733$             |
| R indices (all data)                 | $R_1 = 0.0874$ , $wR_2 = 0.1891$             |
| Largest diff. peak and hole          | 0.477 and $-0.403 \text{ e.}\text{\AA}^{-3}$ |

- 1 (a) *SMART diffractometer control software*, Bruker Analytical X-ray Instruments Inc., Madison, WI, 2000. (b) *SAINTE integration software*, Siemens Analytical X-ray Instruments Inc., Madison, WI, 2000. (c) G. M. Sheldrick, *SADABS: A program for absorption correction with the Siemens SMART system*; University of Göttingen: Germany, 2001. (d) *SHELXTL program system version 6.1*; Bruker Analytical X-ray Instruments Inc., Madison, WI, 1998. (e) *International Tables for Crystallography*, Kluwer, Dordrecht, 1992, vol. C.

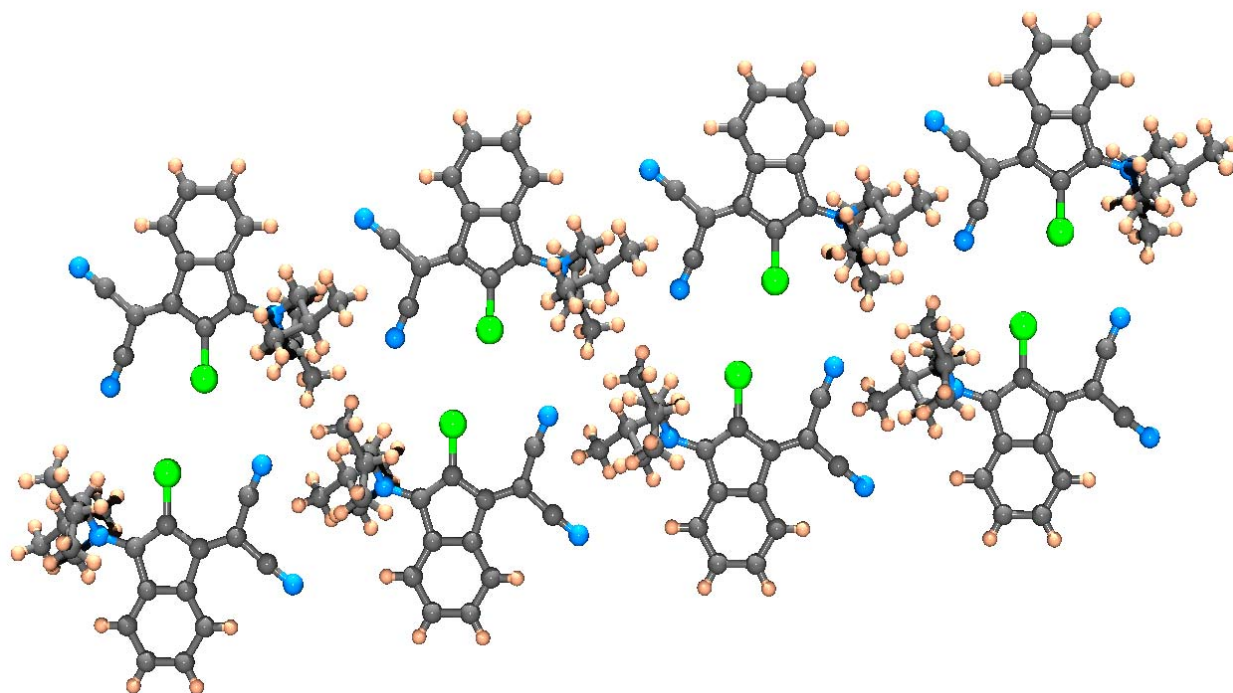

**Fig. 1.** Crystal packing of **3**

## 2. NMR and UV spectra of compounds 2-10.

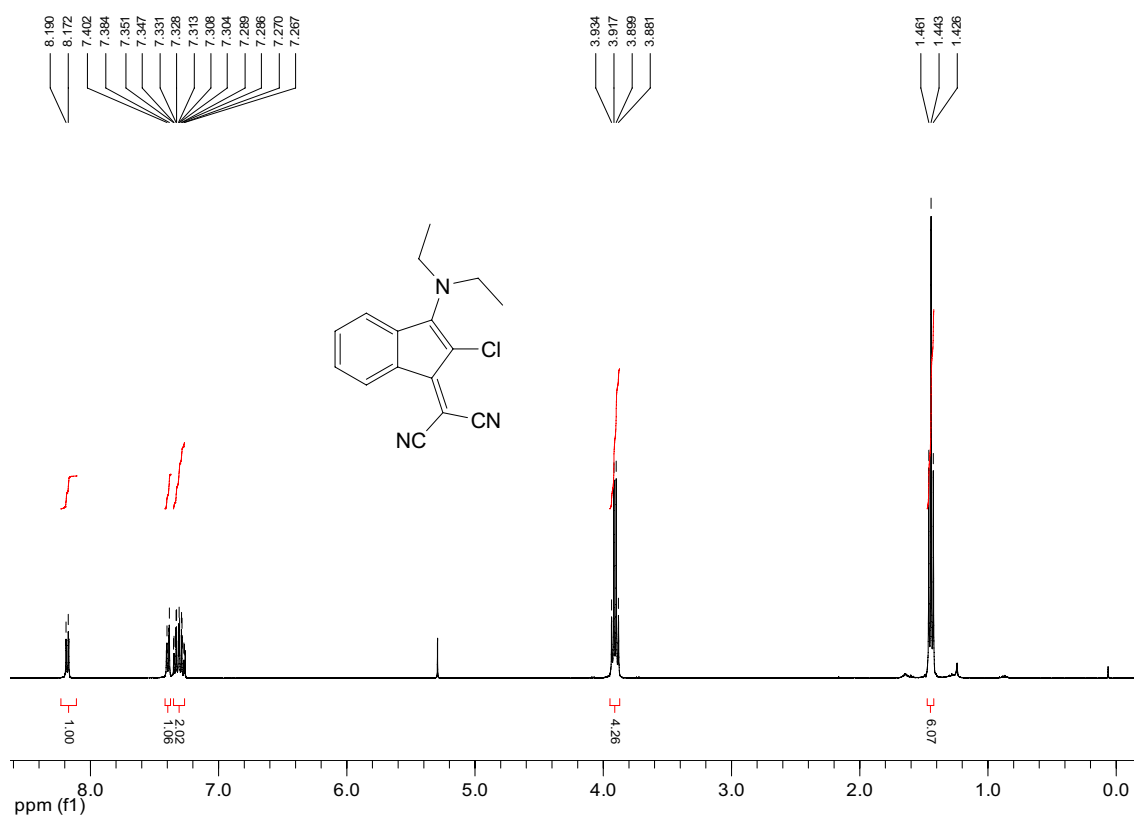

Fig. 2.  $^1\text{H}$  NMR ( $\text{CDCl}_3$ , 400 MHz) of 2

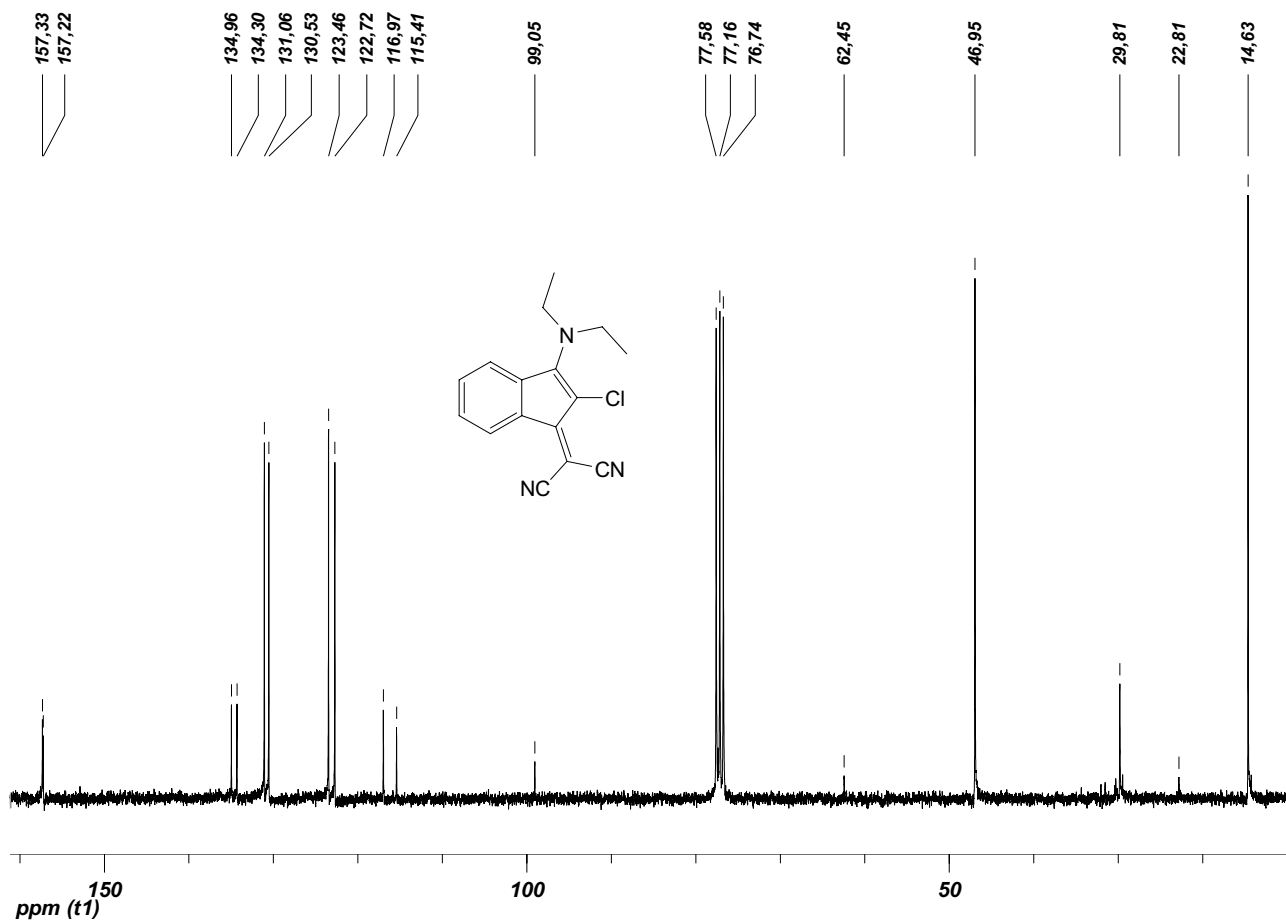

Fig. 3.  $^{13}\text{C}$  NMR ( $\text{CDCl}_3$ , 75 MHz) of **2**

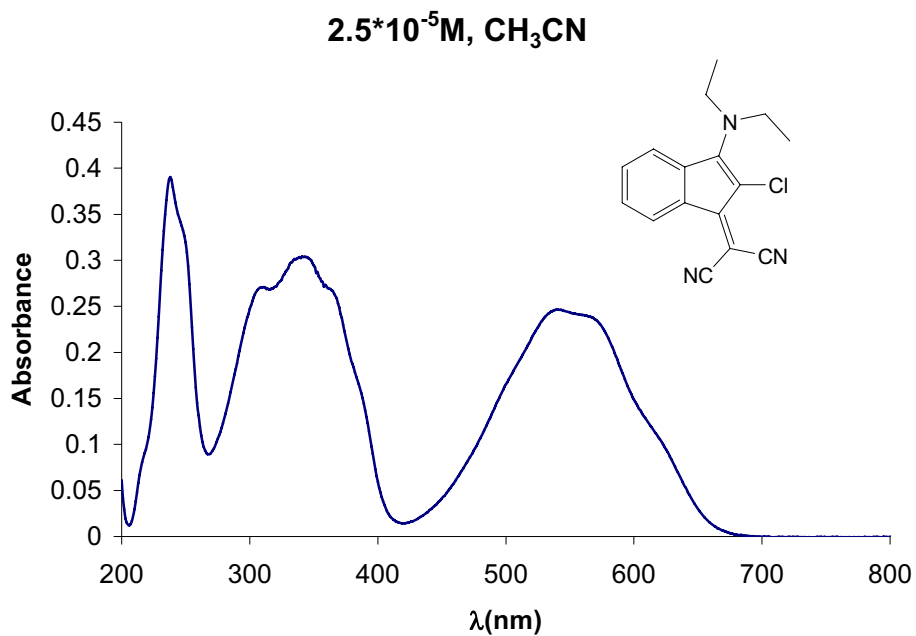

Fig. 4. UV-vis ( $\text{CH}_3\text{CN}$ ,  $2.5 \times 10^{-5}$  M) of **2**

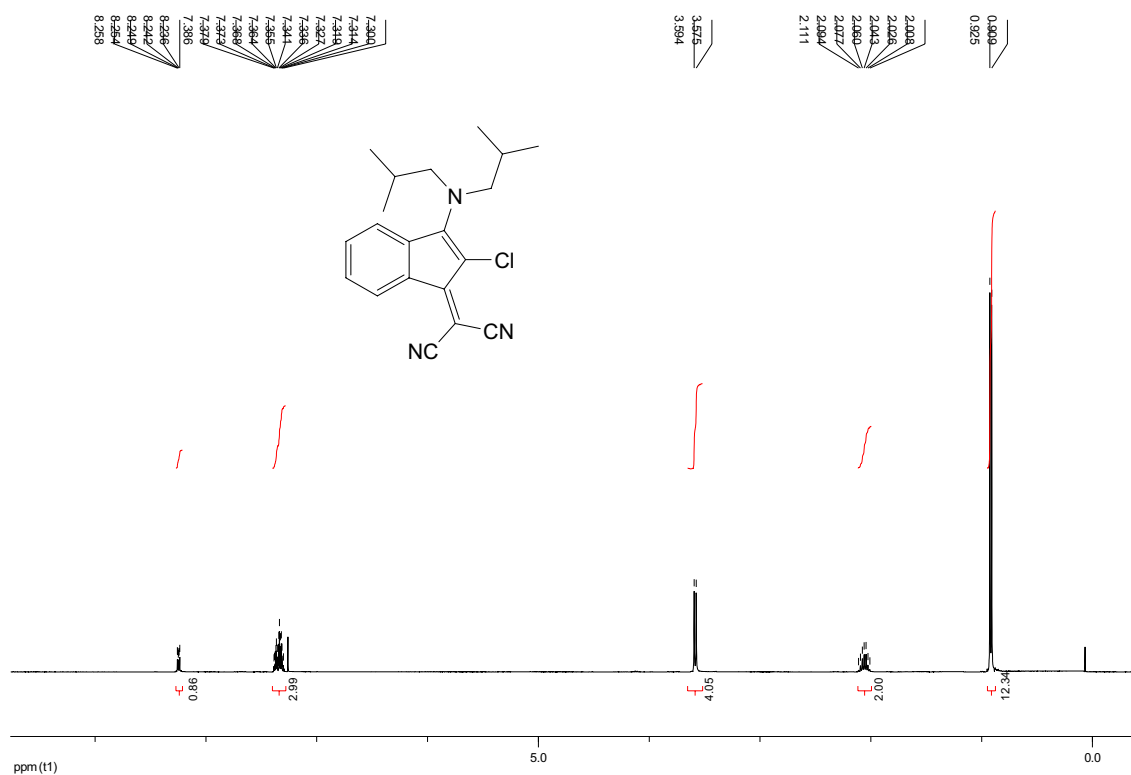

**Fig. 5.** <sup>1</sup>H NMR (CDCl<sub>3</sub>, 400 MHz) of **3**

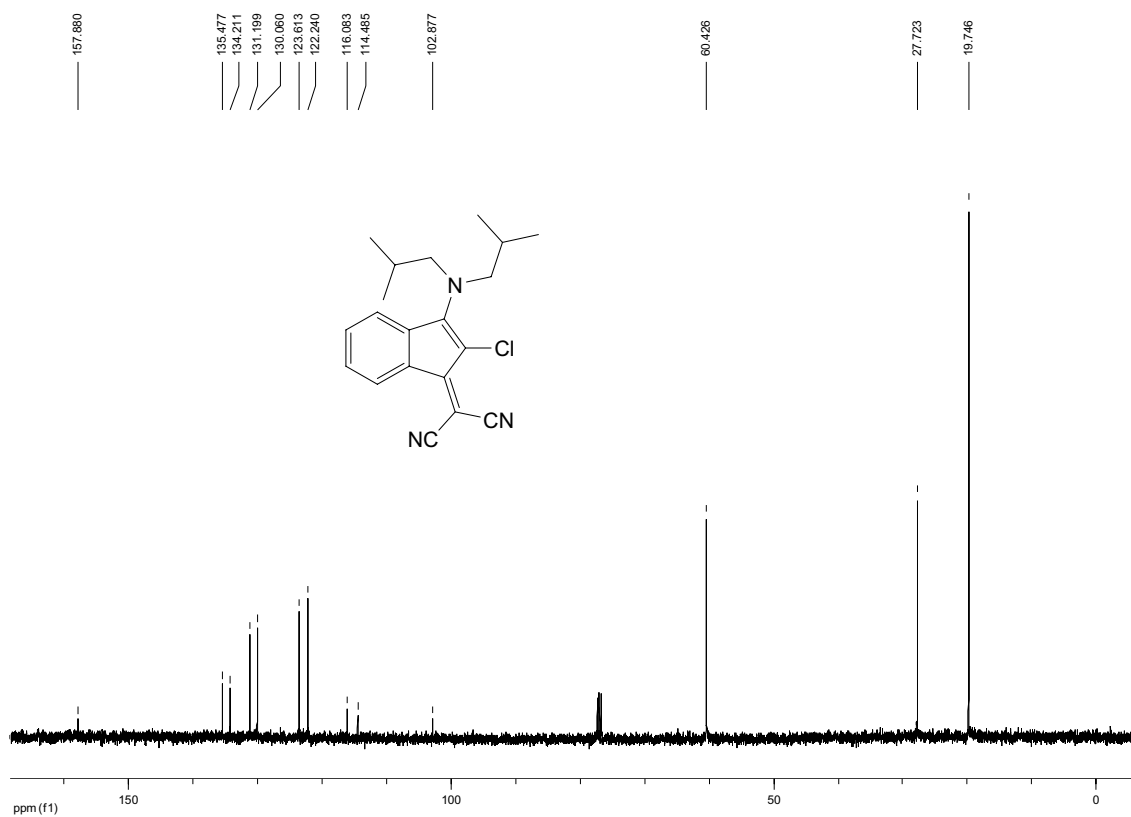

**Fig. 6.** <sup>13</sup>C NMR (CDCl<sub>3</sub>, 100 MHz) of **3**

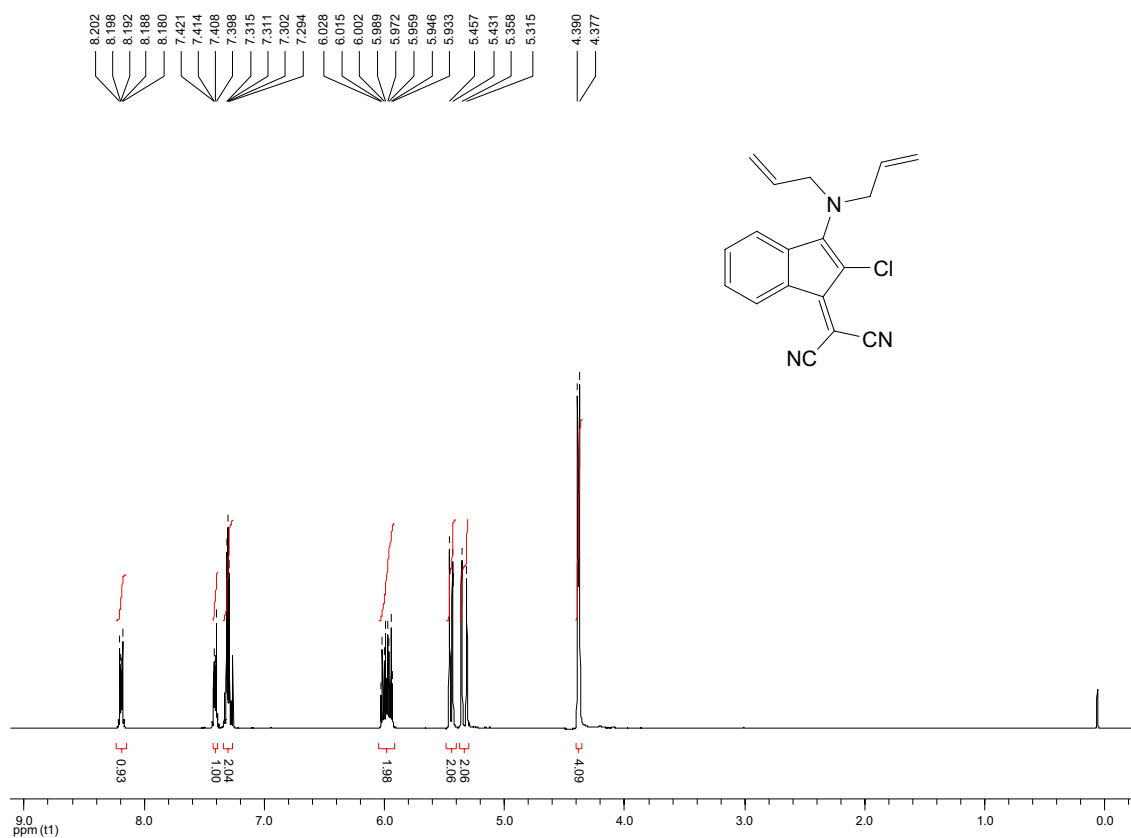

Fig. 7.  $^1\text{H}$  NMR ( $\text{CDCl}_3$ , 400 MHz) of 4

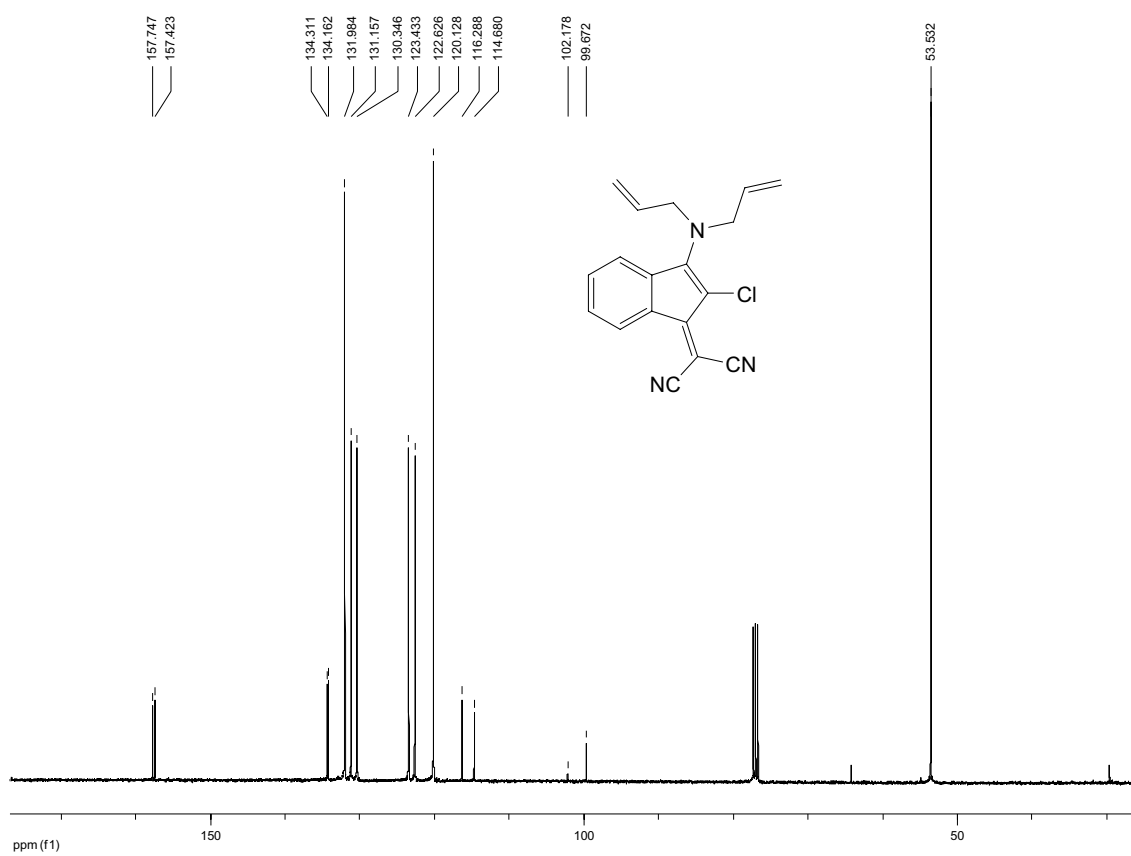

Fig. 8.  $^{13}\text{C}$  NMR ( $\text{CDCl}_3$ , 100 MHz) of 4

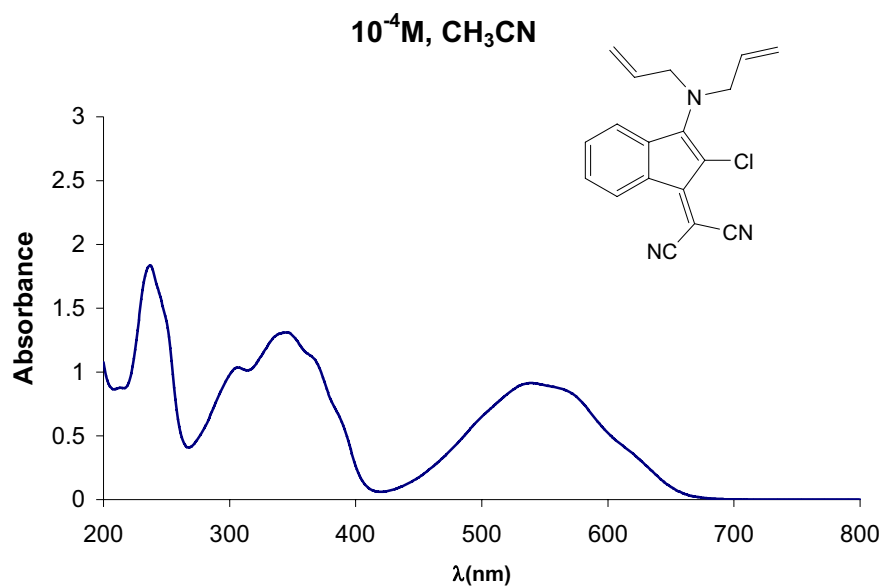

**Fig. 9.** UV-vis (CH<sub>3</sub>CN,  $10^{-4}$  M) of **4**

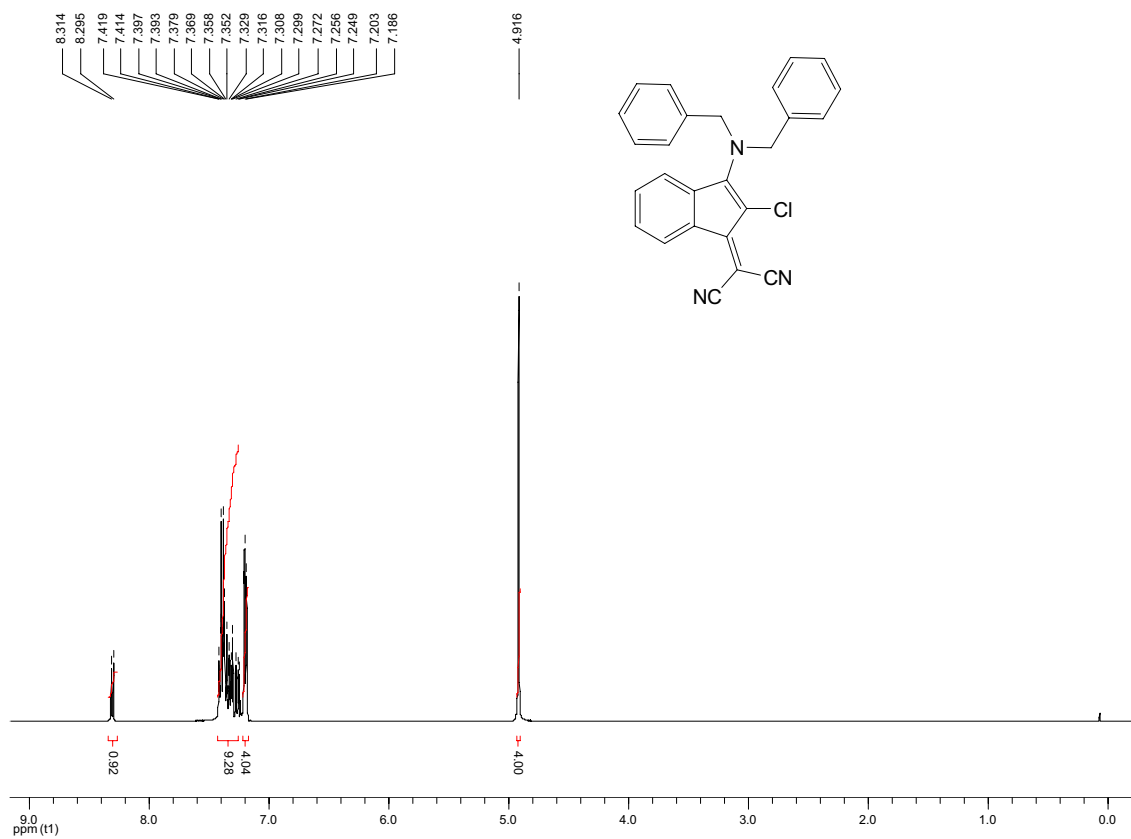

**Fig. 10.** <sup>1</sup>H NMR (CDCl<sub>3</sub>, 400 MHz) of **5**



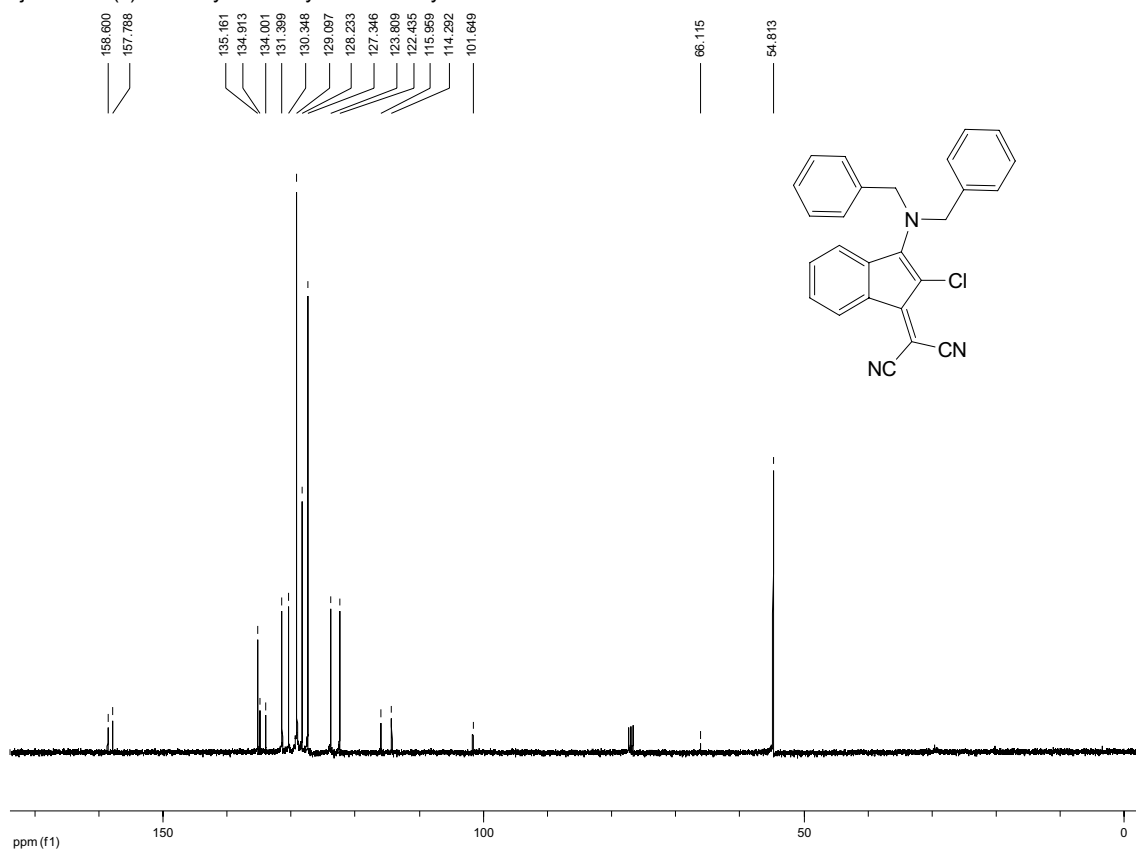

Fig. 11.  $^{13}\text{C}$  NMR ( $\text{CDCl}_3$ , 100 MHz) of 5

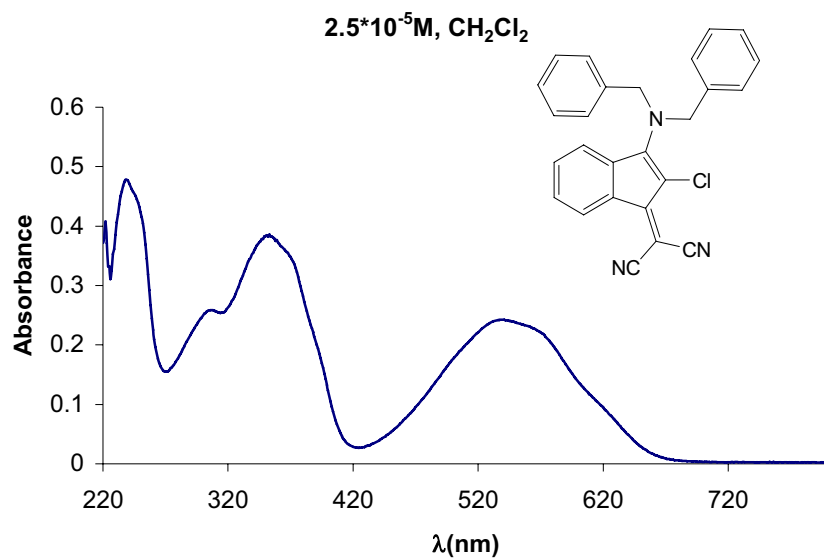

Fig. 12. UV-vis ( $\text{CH}_2\text{Cl}_2$ ,  $2.5 \times 10^{-5} \text{ M}$ ) of 5

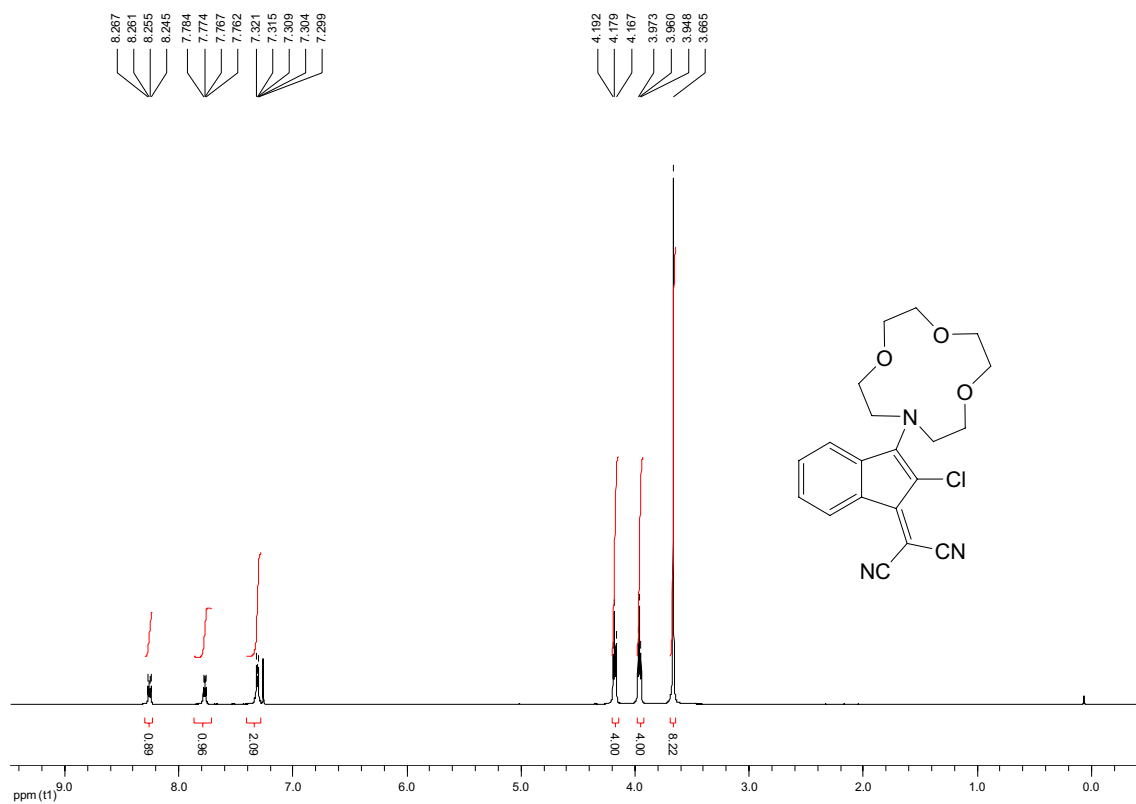

Fig. 13.  $^1\text{H}$  NMR ( $\text{CDCl}_3$ , 400 MHz) of **6**

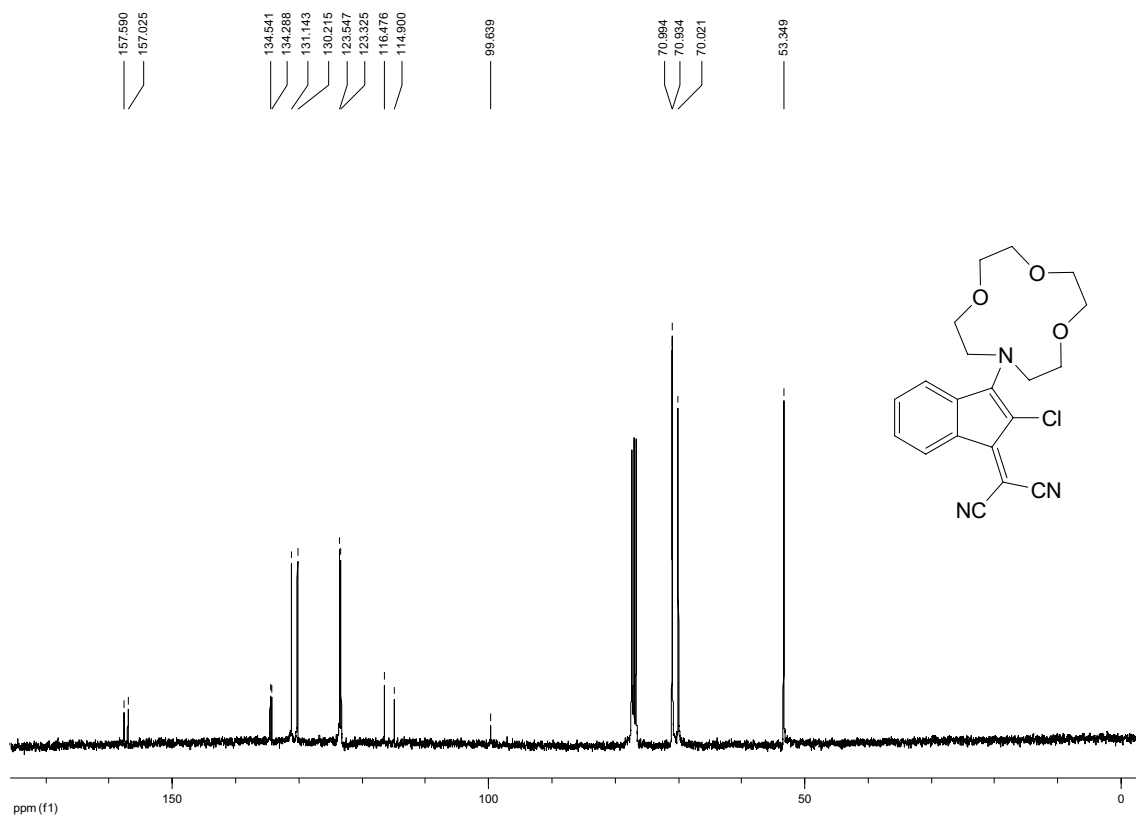

Fig. 14.  $^{13}\text{C}$  NMR ( $\text{CDCl}_3$ , 100 MHz) of **6**

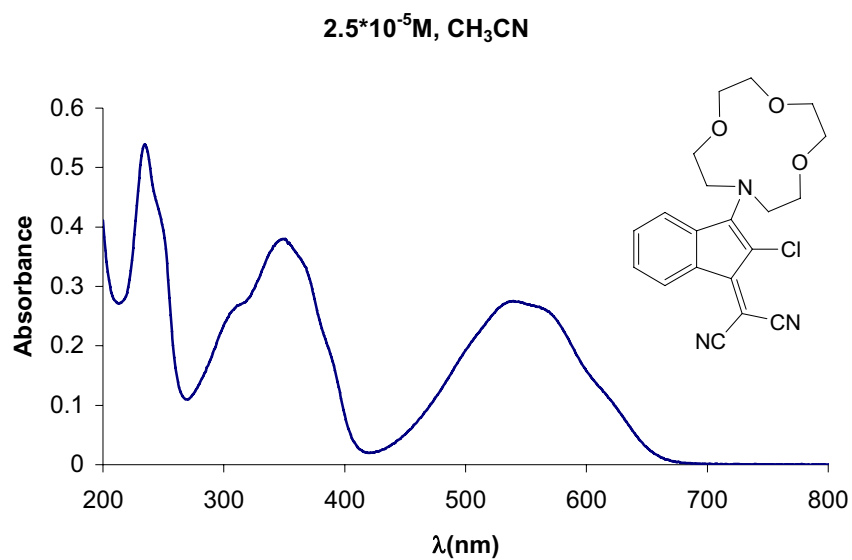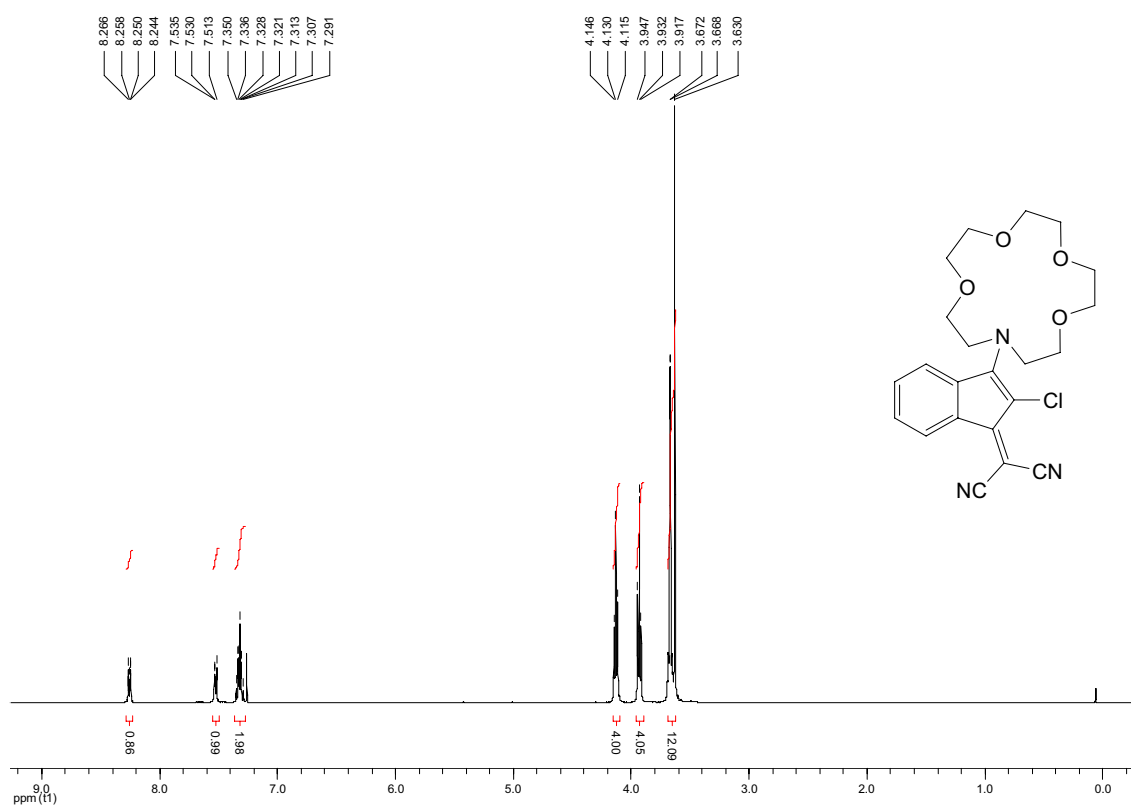

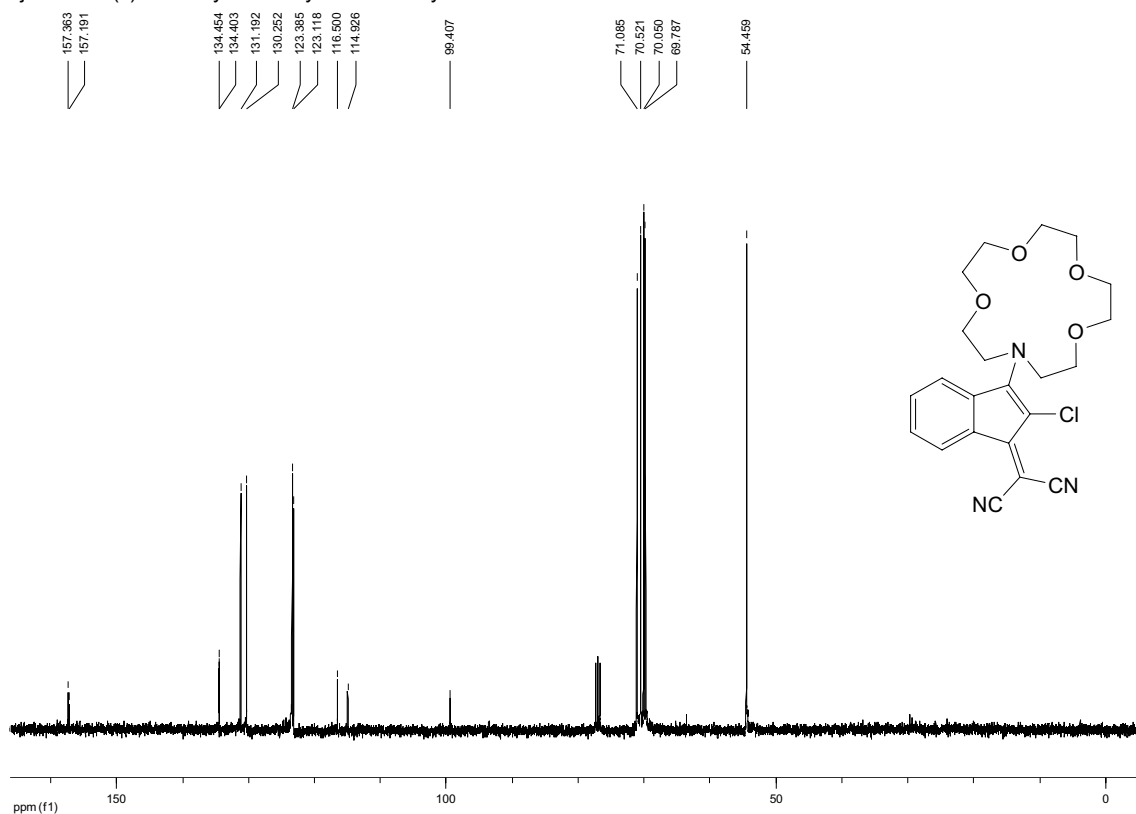

Fig. 17.  $^{13}\text{C}$  NMR ( $\text{CDCl}_3$ , 100 MHz) of 7

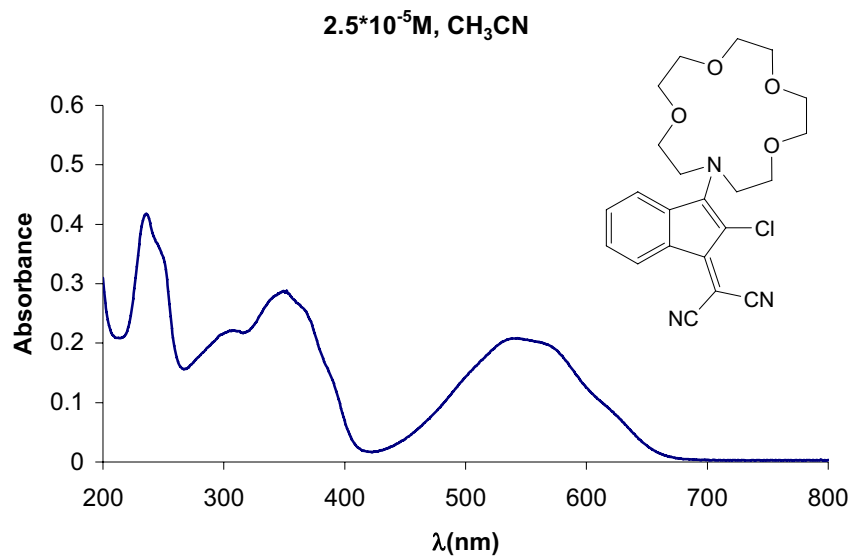

Fig. 18. UV-vis ( $\text{CH}_2\text{Cl}_2$ ,  $2.5 \times 10^{-5}$  M) of 7

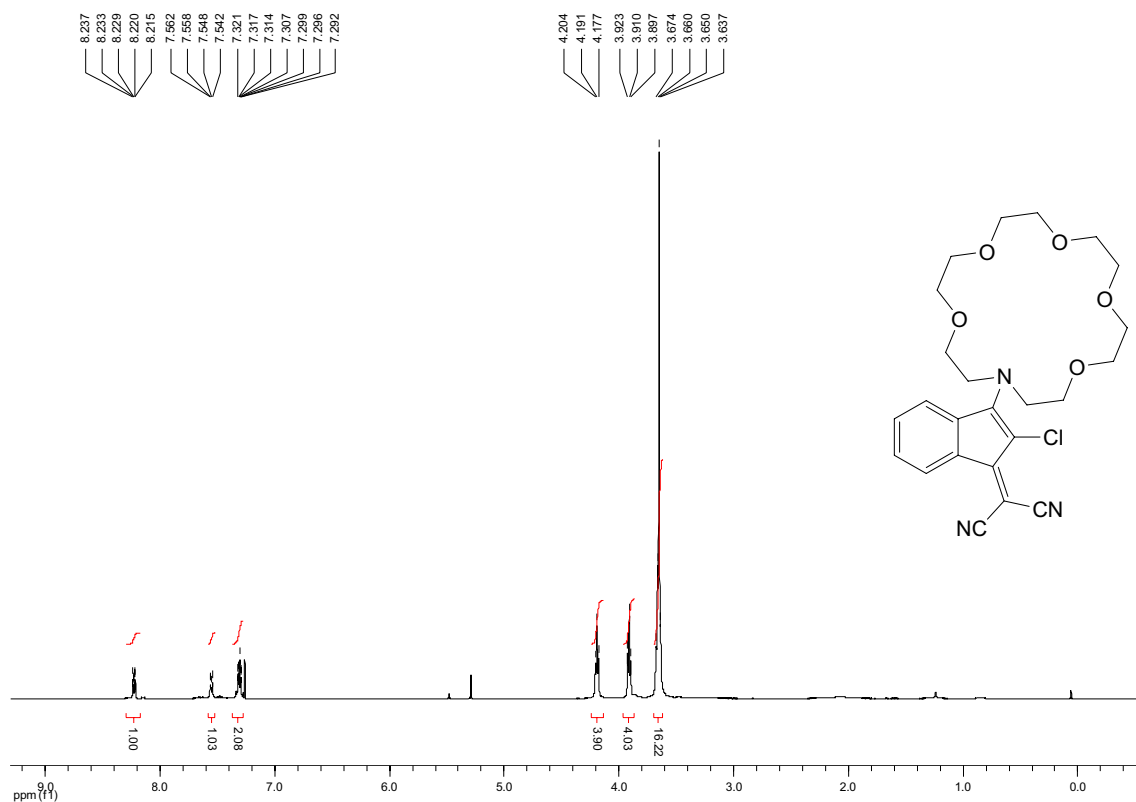

**Fig. 19.**  $^1\text{H}$  NMR ( $\text{CDCl}_3$ , 400 MHz) of **8**

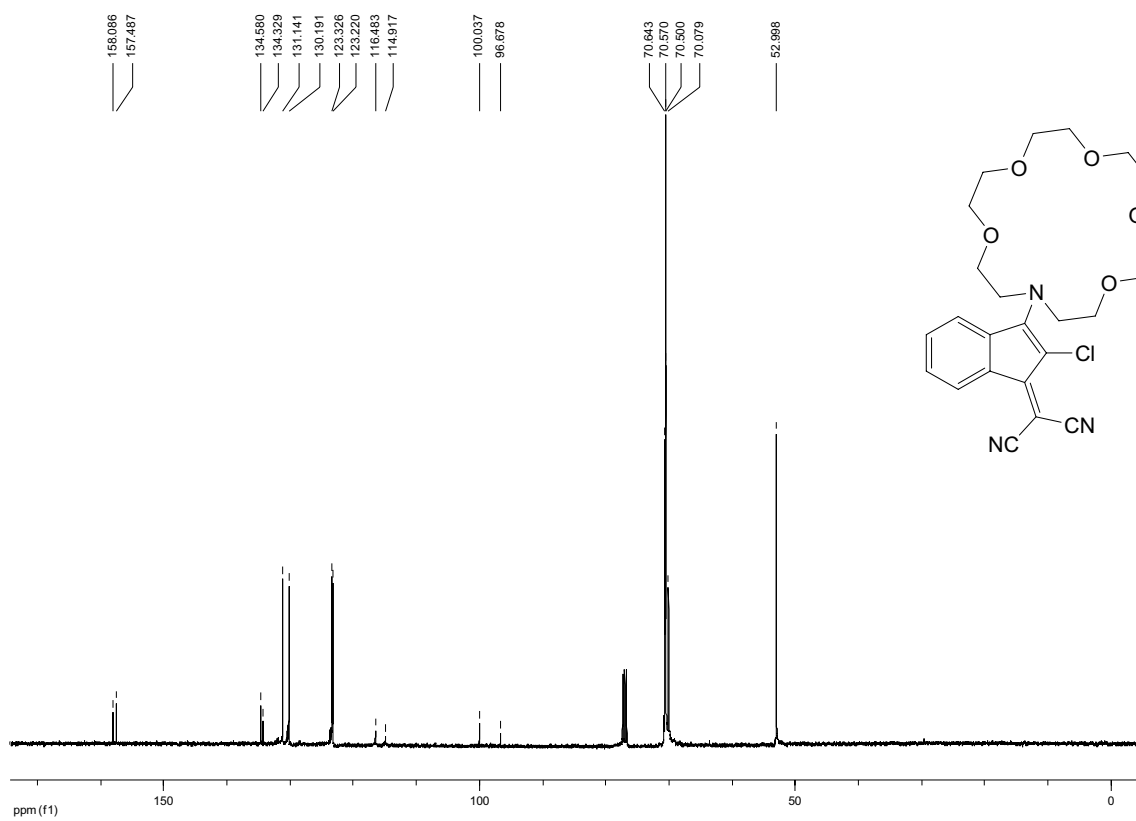

**Fig. 20.**  $^{13}\text{C}$  NMR ( $\text{CDCl}_3$ , 100 MHz) of **8**

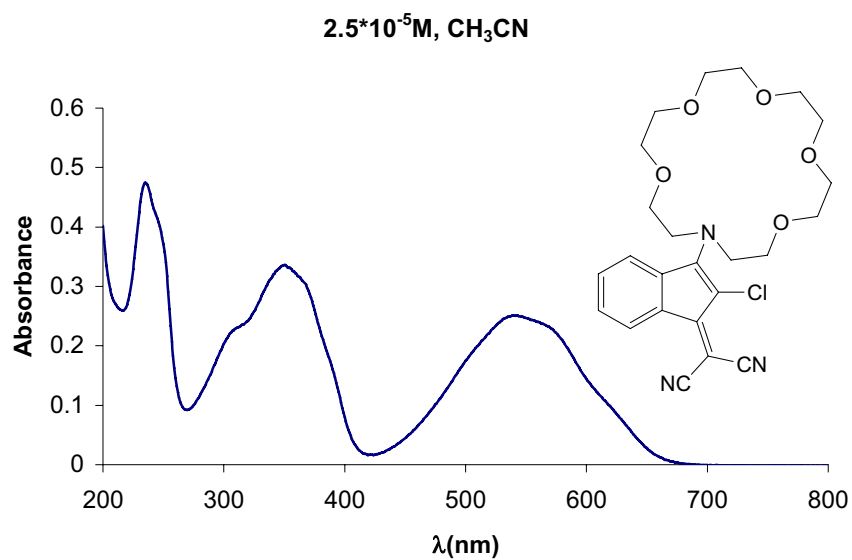

**Fig. 21.** UV-vis ( $\text{CH}_2\text{Cl}_2$ ,  $2.5 \times 10^{-5} \text{ M}$ ) of **8**

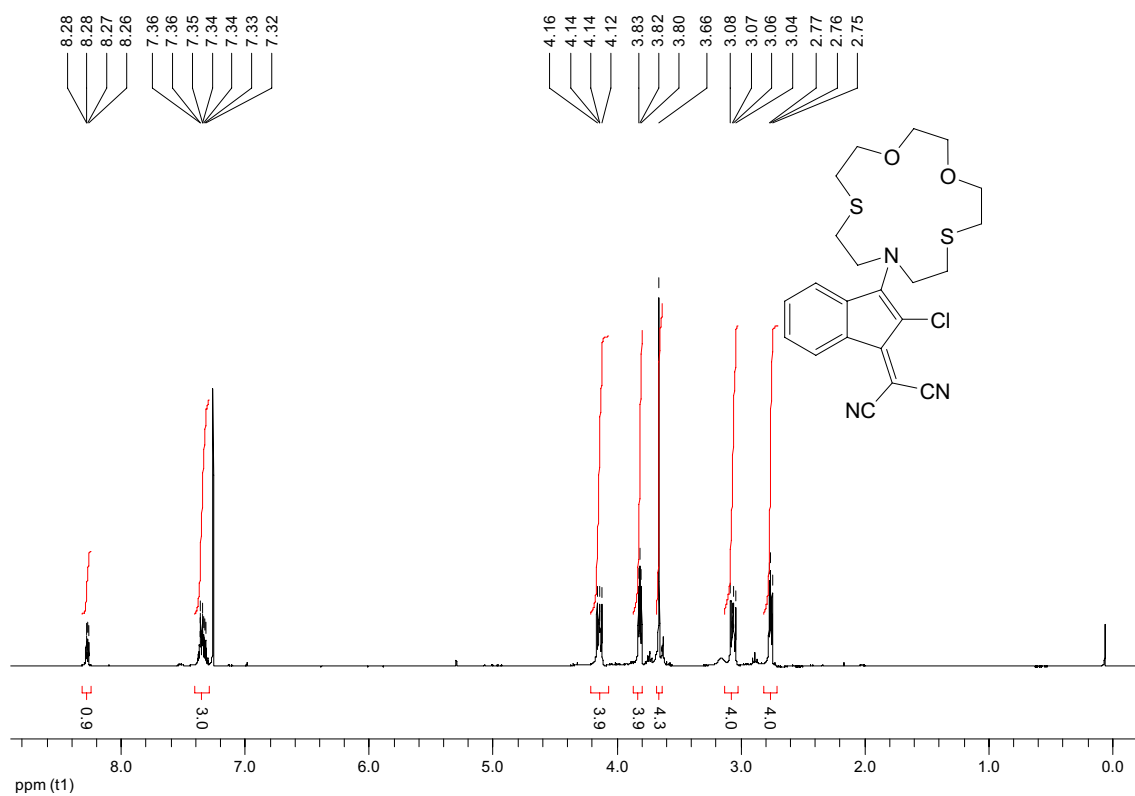

**Fig. 22.**  $^1\text{H}$  NMR ( $\text{CDCl}_3$ , 400 MHz) of **9**

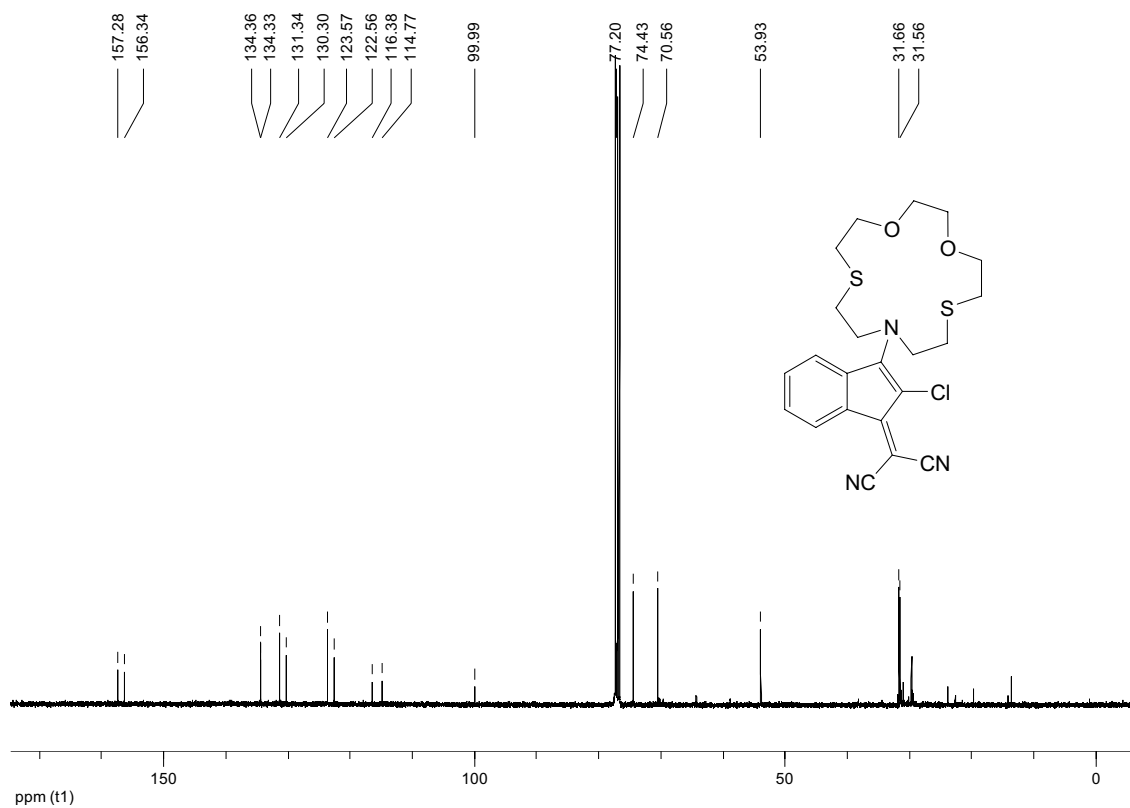

Fig. 23.  $^{13}\text{C}$  NMR ( $\text{CDCl}_3$ , 100 MHz) of **9**

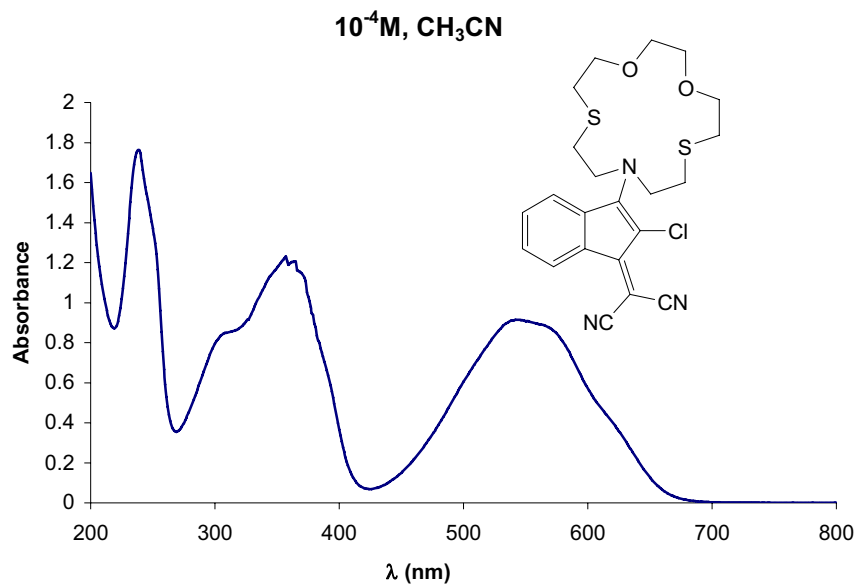

Fig. 24. UV-vis ( $\text{CH}_3\text{CN}$ ,  $10^{-4}$  M) of **9**

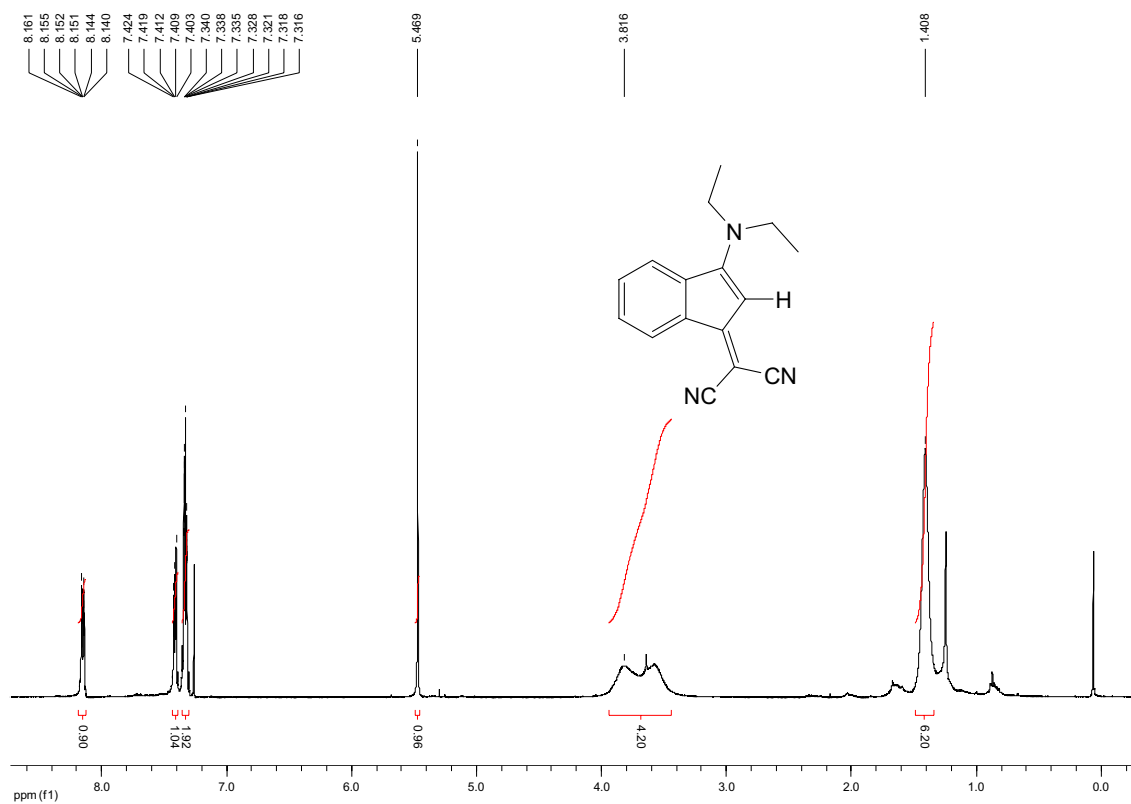

Fig. 25.  $^1\text{H}$  NMR ( $\text{CDCl}_3$ , 400 MHz) of **10**

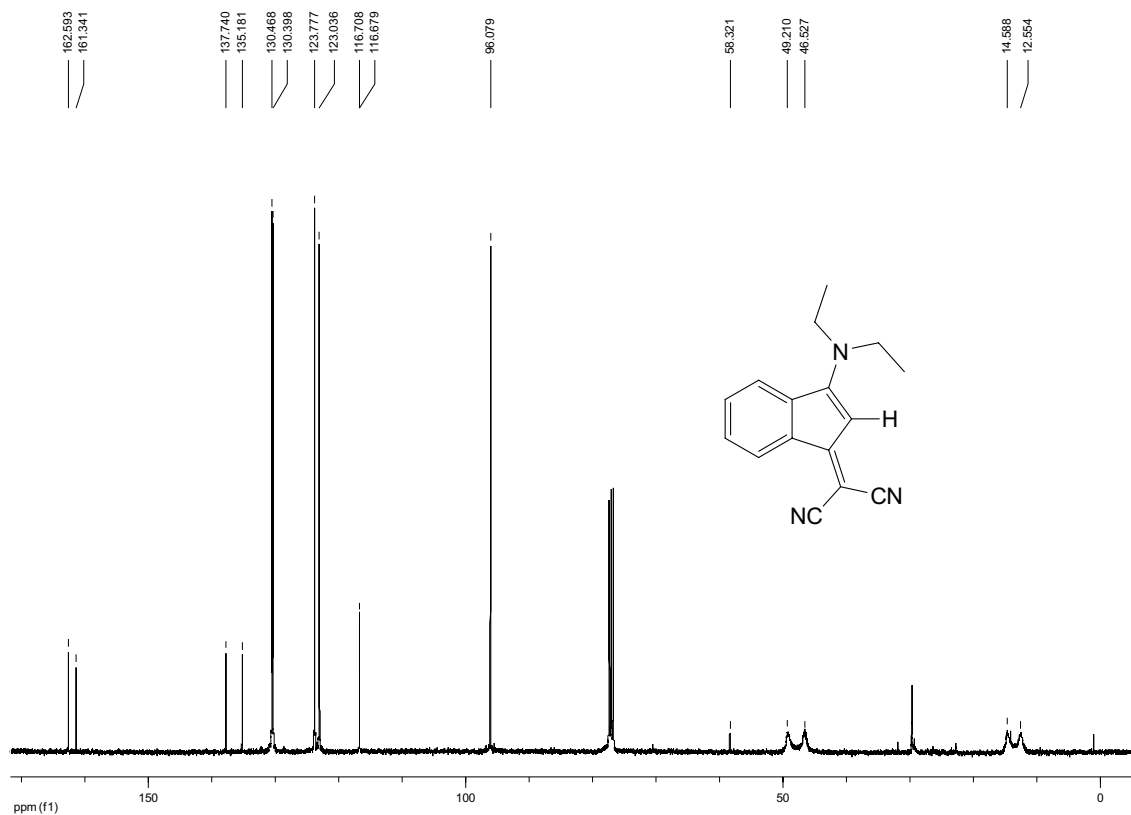

Fig. 26.  $^{13}\text{C}$  NMR ( $\text{CDCl}_3$ , 100 MHz) of **10**



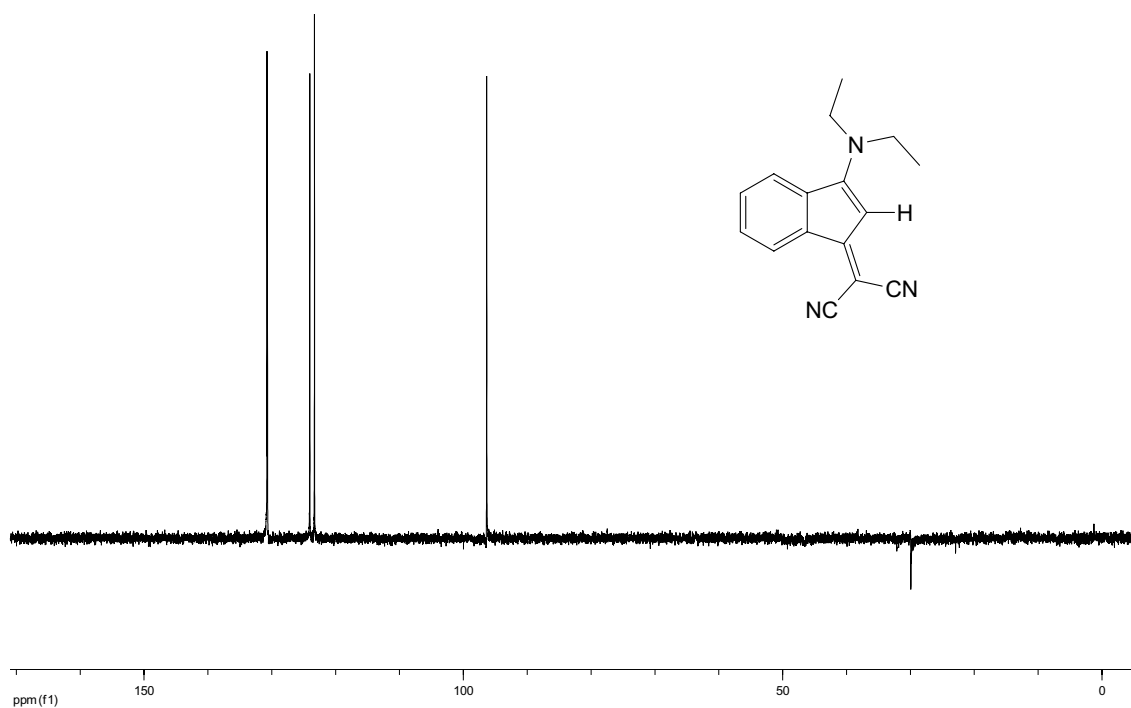

**Fig. 27. DEPT NMR (CDCl<sub>3</sub>, 100 MHz) of 10**

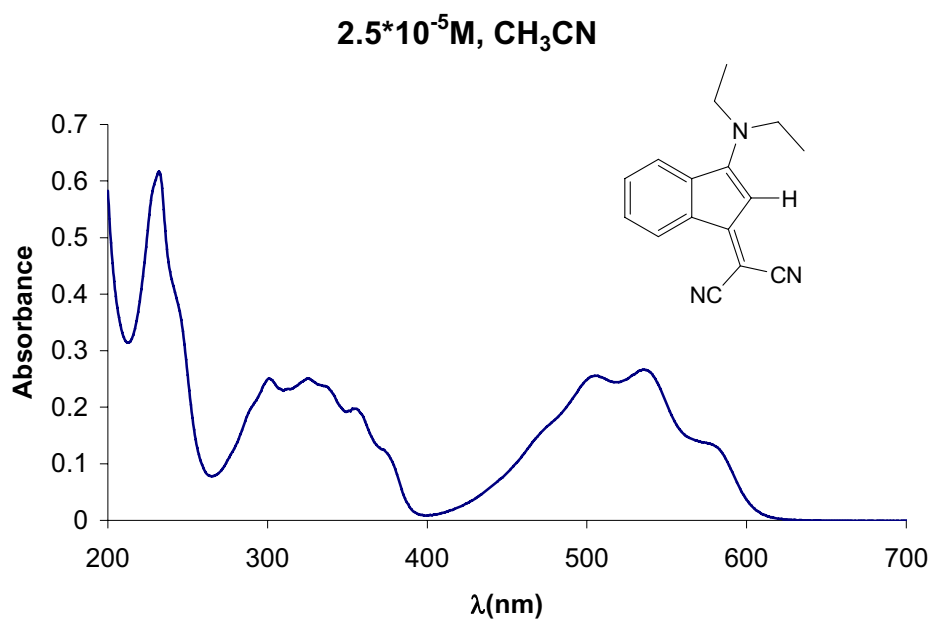

**Fig. 28. UV-vis (CH<sub>3</sub>CN, 2.5x10<sup>-5</sup> M) of 10**

### 3. Titration Materials and Methods.

Perchlorate salts were used for some cations and triflate salts for the rest of cations:

| <b>CATION</b>          | <b>SALT</b>                                              |
|------------------------|----------------------------------------------------------|
| <b>Ag<sup>+</sup></b>  | <b>AgClO<sub>4</sub> · xH<sub>2</sub>O</b>               |
| <b>Ni<sup>2+</sup></b> | <b>Ni(ClO<sub>4</sub>)<sub>2</sub> · 6H<sub>2</sub>O</b> |
| <b>Sn<sup>2+</sup></b> | <b>Sn(CF<sub>3</sub>SO<sub>3</sub>)<sub>2</sub></b>      |
| <b>Cd<sup>2+</sup></b> | <b>Cd(ClO<sub>4</sub>)<sub>2</sub></b>                   |
| <b>Zn<sup>2+</sup></b> | <b>Zn(CF<sub>3</sub>SO<sub>3</sub>)<sub>2</sub></b>      |
| <b>Pb<sup>2+</sup></b> | <b>Pb(ClO<sub>4</sub>)<sub>2</sub></b>                   |
| <b>Cu<sup>2+</sup></b> | <b>Cu(ClO<sub>4</sub>)<sub>2</sub> · 6H<sub>2</sub>O</b> |
| <b>Fe<sup>3+</sup></b> | <b>Fe(ClO<sub>4</sub>)<sub>3</sub> · xH<sub>2</sub>O</b> |
| <b>Sc<sup>3+</sup></b> | <b>Sc(CF<sub>3</sub>SO<sub>3</sub>)<sub>3</sub></b>      |
| <b>Al<sup>3+</sup></b> | <b>Al(ClO<sub>4</sub>)<sub>3</sub> · 9H<sub>2</sub>O</b> |
| <b>Hg<sup>2+</sup></b> | <b>Hg(ClO<sub>4</sub>)<sub>2</sub></b>                   |

$5 \times 10^{-2}$  M,  $5 \times 10^{-3}$  M,  $5 \times 10^{-4}$  M solutions of every salt were prepared, then a  $10^{-4}$  M solution of the compound under study was prepared. For qualitative experiments, 2 mL solution of the compound under study were measured and the corresponding amount of salt was added by micropipette.

#### Eppendorf Research micropipette characteristics:

| <b>MODEL</b>       | <b>Ep T.I.P.S.</b> | <b>Volume</b> | <b>Systematic error of measurement</b> | <b>Random error of measurement (CV)</b> |
|--------------------|--------------------|---------------|----------------------------------------|-----------------------------------------|
| 2 - 20 $\mu$ L     | 2 - 200            | 2 $\mu$ L     | $\pm 5.0$ %                            | $\leq 1.5$ %                            |
|                    |                    | 10 $\mu$ L    | $\pm 1.2$ %                            | $\leq 0.6$ %                            |
|                    |                    | 20 $\mu$ L    | $\pm 1.0$ %                            | $\leq 0.3$ %                            |
| 10 - 100 $\mu$ L   | 2 - 200            | 10 $\mu$ L    | $\pm 3.0$ %                            | $\leq 1.0$ %                            |
|                    |                    | 50 $\mu$ L    | $\pm 1.0$ %                            | $\leq 0.3$ %                            |
|                    |                    | 100 L         | $\pm 0.8$ %                            | $\leq 0.2$ %                            |
| 100 - 1000 $\mu$ L | 50 - 1000          | 100 $\mu$ L   | $\pm 3.0$ %                            | $\leq 0.6$ %                            |
|                    |                    | 5000 $\mu$ L  | $\pm 1.0$ %                            | $\leq 0.2$ %                            |
|                    |                    | 1000 $\mu$ L  | $\pm 0.6$ %                            | $\leq 0.2$ %                            |
| 500 - 5000 $\mu$ L | 100 - 5000         | 500 $\mu$ L   | $\pm 2.4$ %                            | $\leq 0.6$ %                            |
|                    |                    | 2500 $\mu$ L  | $\pm 1.2$ %                            | $\leq 0.25$ %                           |
|                    |                    | 5000 $\mu$ L  | $\pm 0.6$ %                            | $\leq 0.15$ %                           |

#### 4. Colorimetric studies

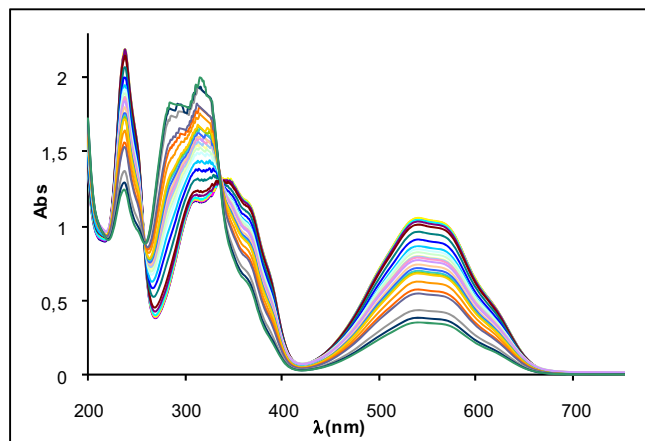

Fig. 29. UV titration of 2 (10<sup>-4</sup> M, CH<sub>3</sub>CN) with Sc<sup>3+</sup>

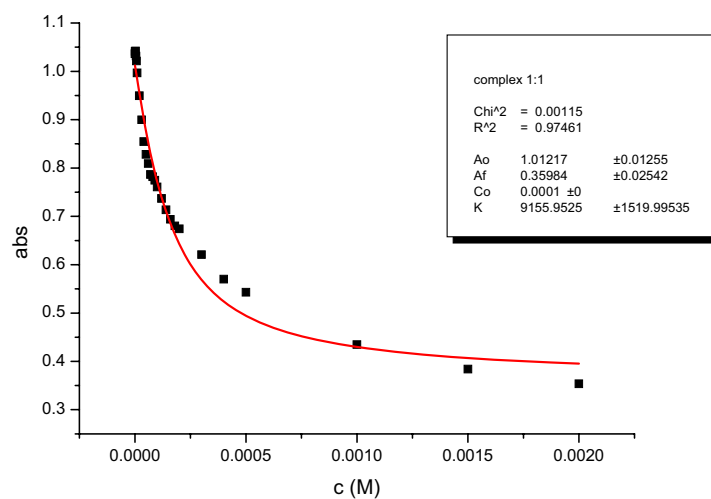

Fig. 30. Titration profile of 2 (10<sup>-4</sup> M, CH<sub>3</sub>CN) and Sc<sup>3+</sup>, λ=550nm

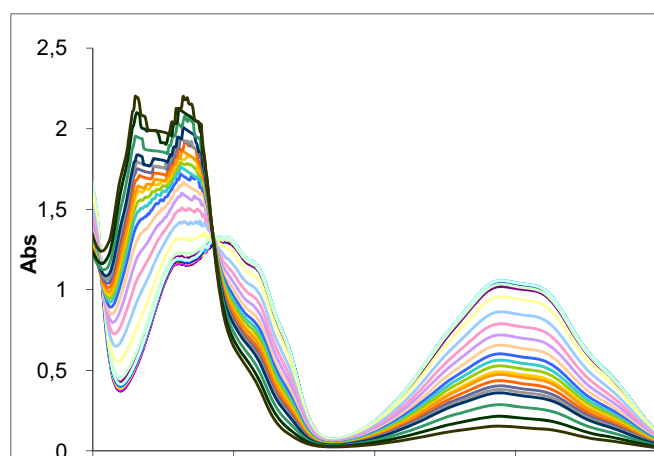

Fig. 31. UV titration of 2 (10<sup>-4</sup> M, CH<sub>3</sub>CN) with Sn<sup>2+</sup>

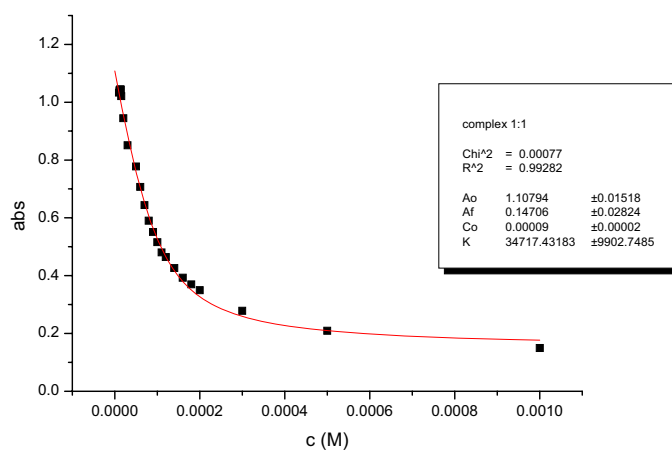

Fig. 32. Titration profile of 2 ( $10^{-4}$  M,  $\text{CH}_3\text{CN}$ ), with  $\text{Sn}^{2+}$ ,  $\lambda=550\text{nm}$

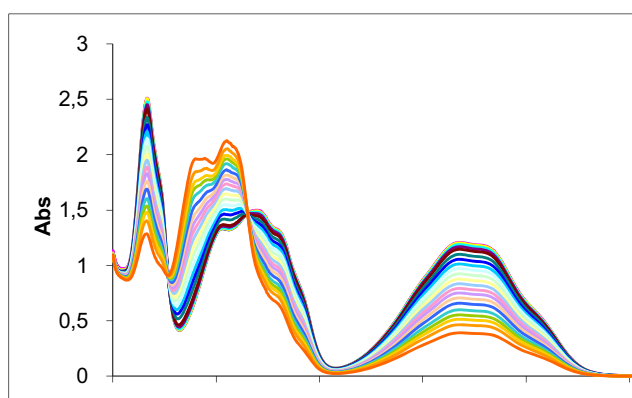

Fig. 33. UV titration of 2 ( $10^{-4}$  M,  $\text{CH}_3\text{CN}$ ), with  $\text{Al}^{3+}$ .

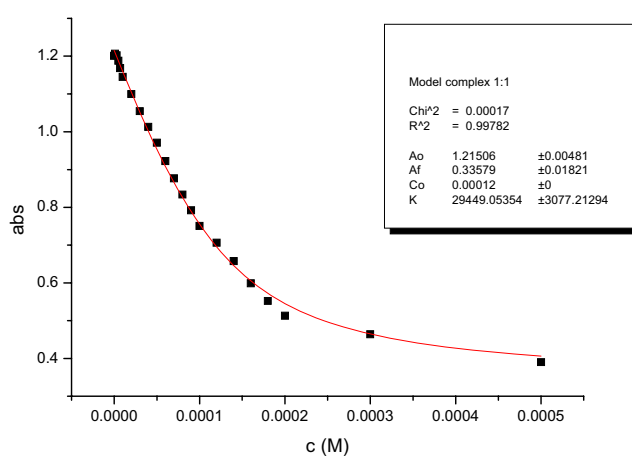

Fig. 34. Titration profile of 2 ( $10^{-4}$  M,  $\text{CH}_3\text{CN}$ ), and  $\text{Al}^{3+}$   $\lambda=550\text{nm}$

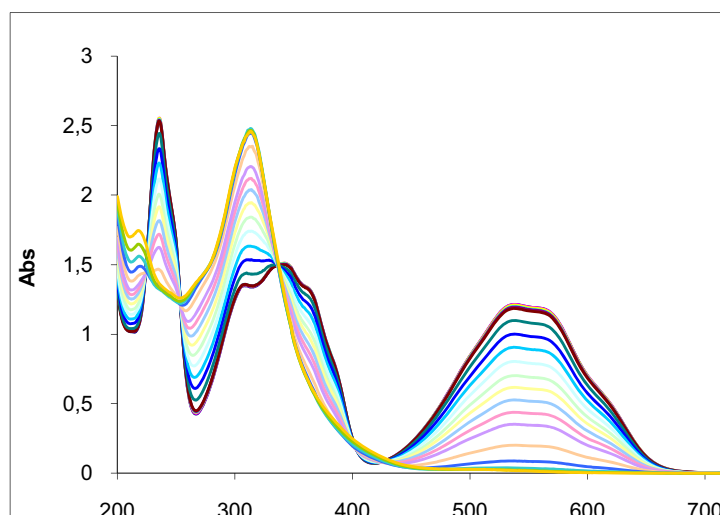

Fig. 35. UV titration of **2** ( $10^{-4}$  M,  $\text{CH}_3\text{CN}$ ) with  $\text{Fe}^{3+}$ .

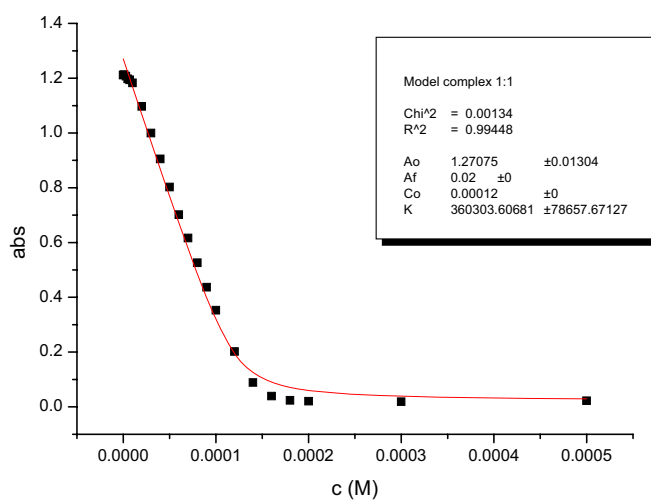

Fig. 36. Titration profile of **2** ( $10^{-4}$  M,  $\text{CH}_3\text{CN}$ ) with  $\text{Fe}^{3+}$   $\lambda=550\text{nm}$

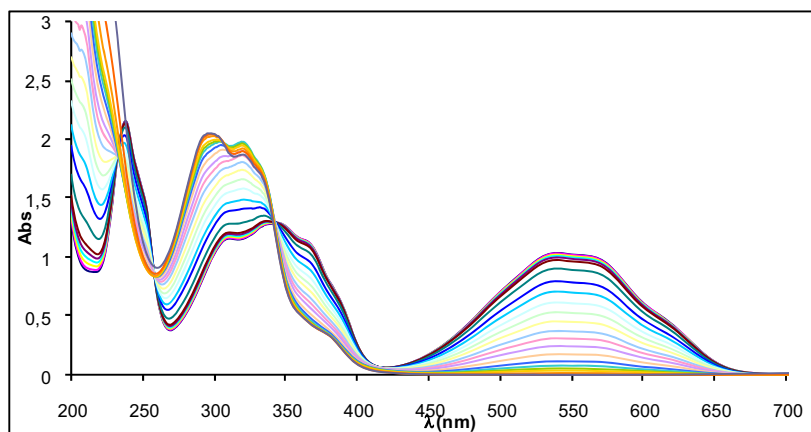

Fig. 37. UV titration of **2** ( $10^{-4}$  M,  $\text{CH}_3\text{CN}$ ) with  $\text{Cu}^{2+}$

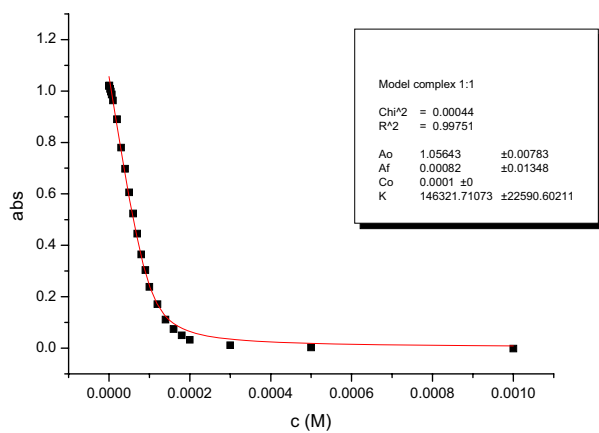

**Fig. 38.** Titration profile of **2** ( $10^{-4}$  M,  $\text{CH}_3\text{CN}$ ) with  $\text{Cu}^{2+}$

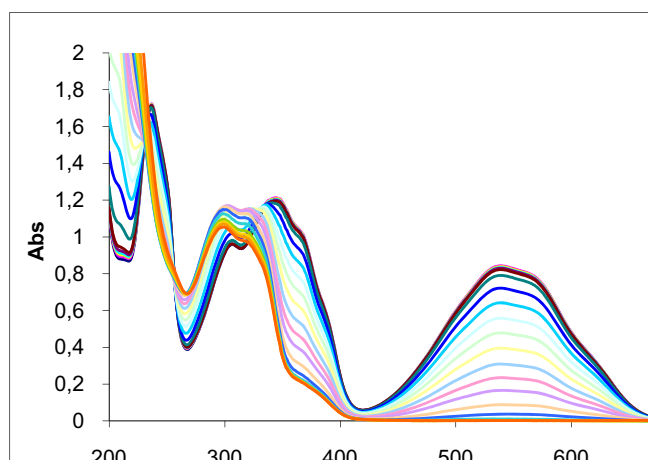

**Fig. 39.** UV titration of **4** ( $10^{-4}$  M,  $\text{CH}_3\text{CN}$ ) with  $\text{Cu}^{2+}$

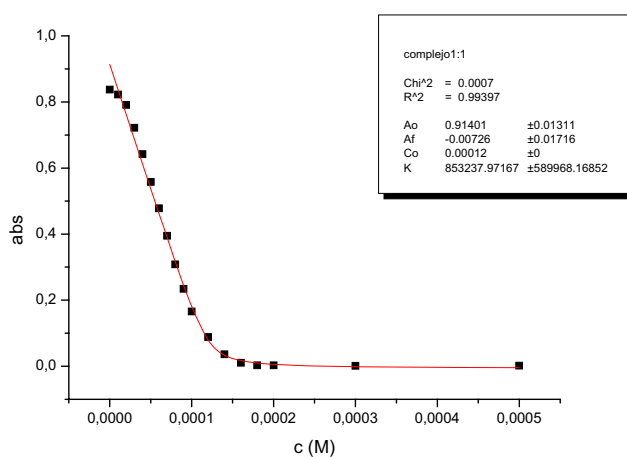

**Fig. 40.** Titration profile of **4** ( $10^{-4}$  M,  $\text{CH}_3\text{CN}$ ) with  $\text{Cu}^{2+}$

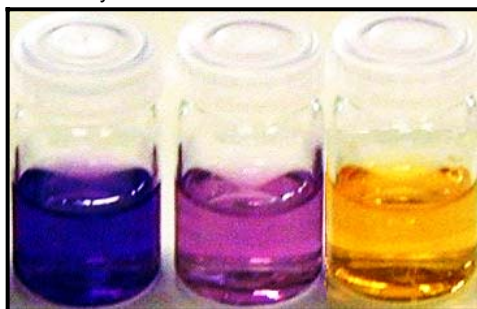

Fig. 41. Color changes of receptor **9** upon addition of 1 eq. of the cations. From left to right: none,  $\text{Hg}^{2+}$ ,  $\text{Cu}^{2+}$ .

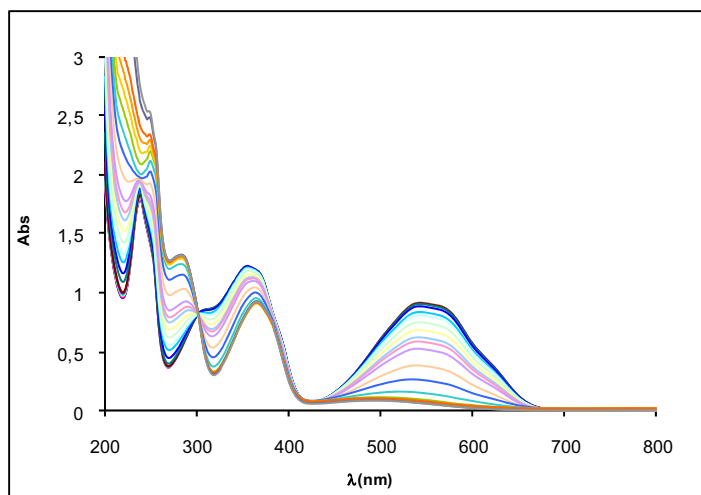

Fig. 42. UV titration of **9** ( $10^{-4}$  M,  $\text{CH}_3\text{CN}$ ) with  $\text{Hg}^{2+}$

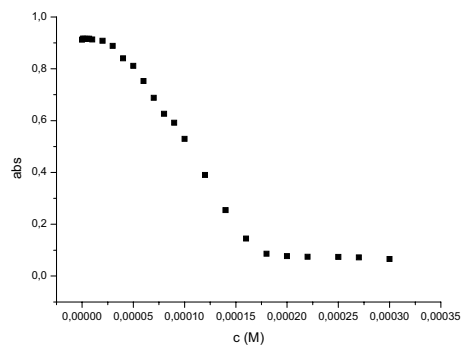

Fig. 43. Titration profile of **9** ( $10^{-4}$  M,  $\text{CH}_3\text{CN}$ ) with  $\text{Hg}^{2+}$

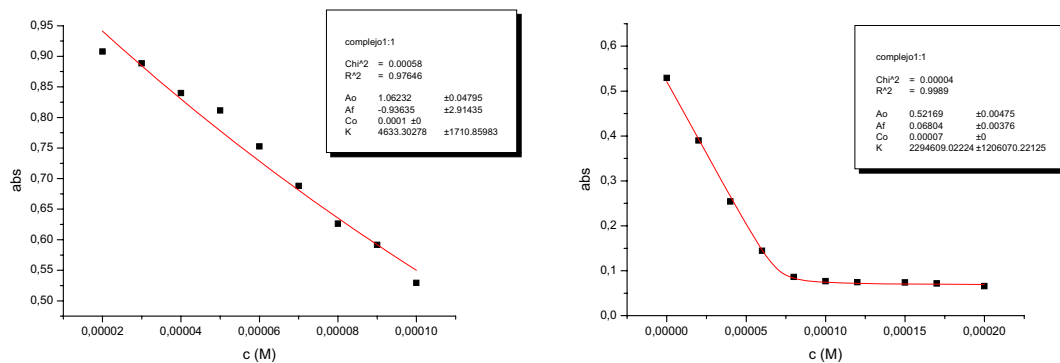

Fig. 44. Sequential fitting of the titration profile of **9** ( $10^{-4}$  M,  $\text{CH}_3\text{CN}$ ) with  $\text{Hg}^{2+}$

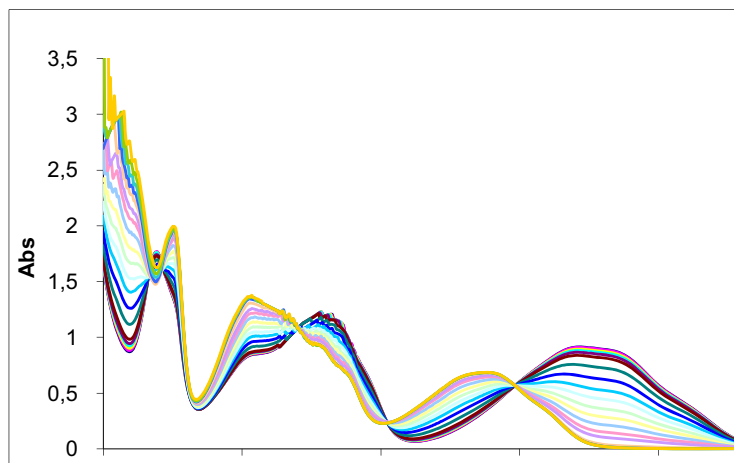

Fig. 45. UV titration of **9** ( $10^{-4}$  M,  $\text{CH}_3\text{CN}$ ) with  $\text{Cu}^{2+}$

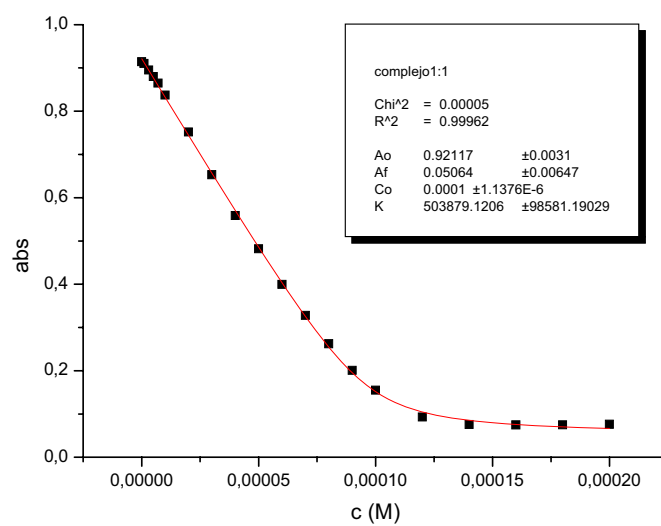

Fig. 46. Titration profile of **9** ( $10^{-4}$  M,  $\text{CH}_3\text{CN}$ ) with  $\text{Cu}^{2+}$



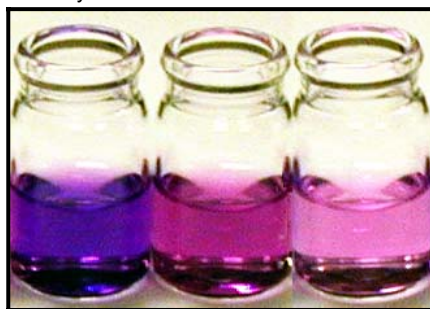

**Fig. 47.** Color changes of receptor **8** upon addition of 1 eq. of different cations. From left to right: none,  $\text{Fe}^{3+}$ ,  $\text{Pb}^{2+}$ .

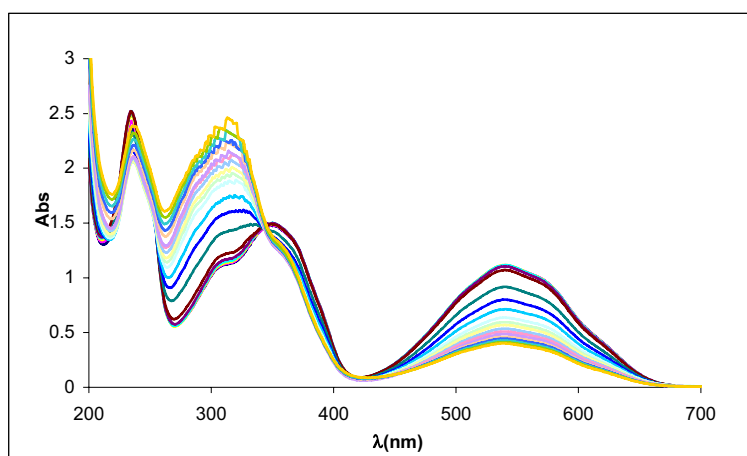

**Fig. 48.** UV titration of **8** ( $10^{-4}$  M,  $\text{CH}_3\text{CN}$ ) with  $\text{Fe}^{3+}$

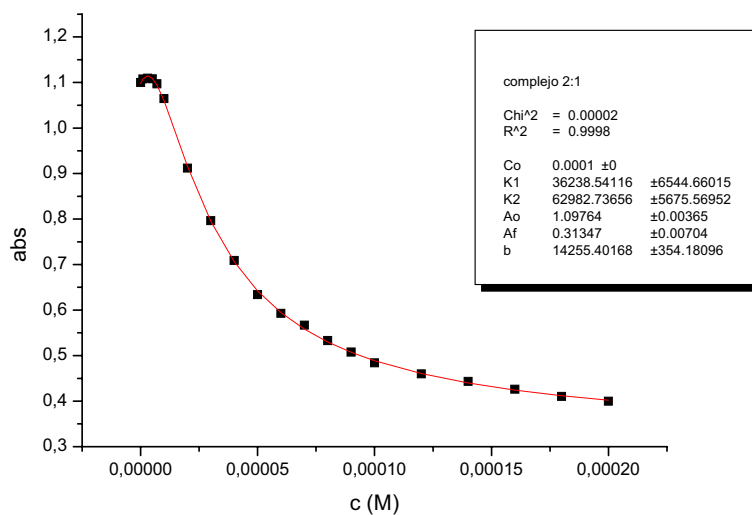

**Fig. 49.** Titration profile of **8** ( $10^{-4}$  M,  $\text{CH}_3\text{CN}$ ) with  $\text{Fe}^{3+}$

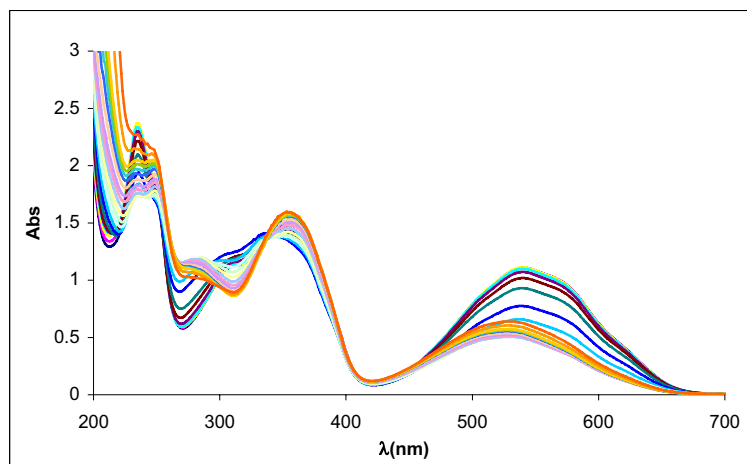

**Fig. 50.** UV titration of **8** (10<sup>-4</sup> M, CH<sub>3</sub>CN) with Pb<sup>2+</sup>

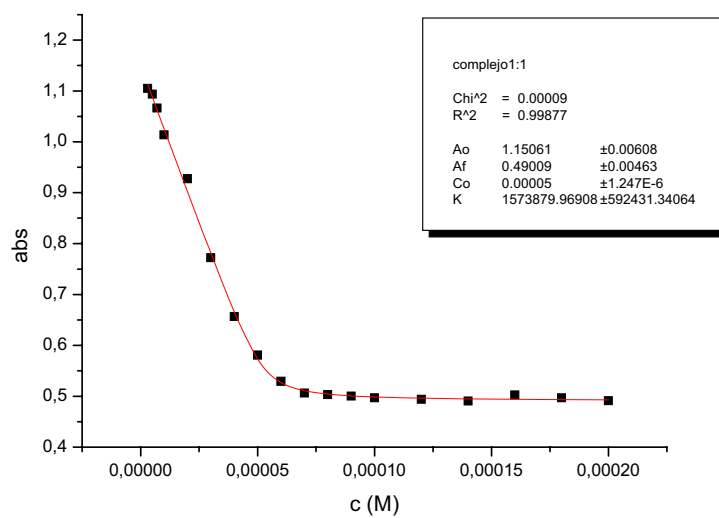

**Fig. 51.** Titration profile of **8** (10<sup>-4</sup> M, CH<sub>3</sub>CN) with Pb<sup>2+</sup>

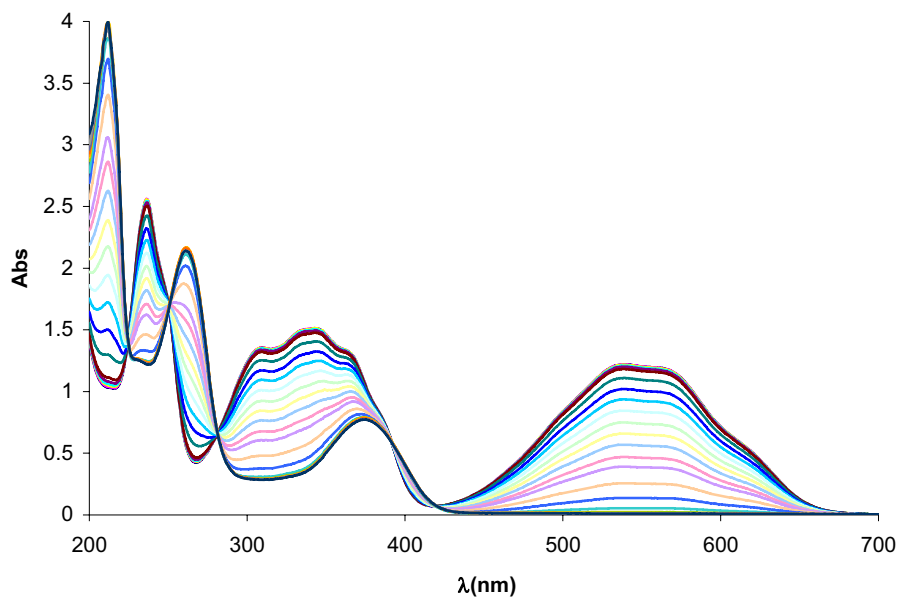

**Fig. 52.** UV titration of **2** (10<sup>-4</sup> M, CH<sub>3</sub>CN) with CN<sup>-</sup>

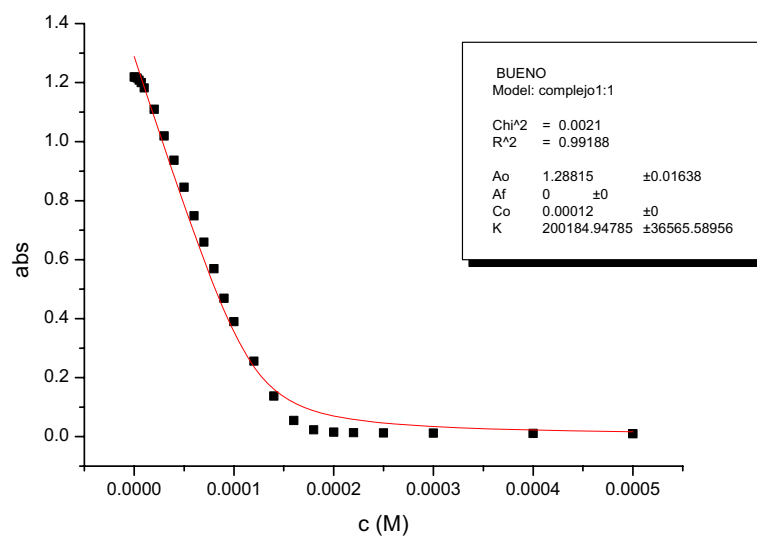

**Fig. 53.** Titration profile of **2** (10<sup>-4</sup> M, CH<sub>3</sub>CN) with CN<sup>-</sup>

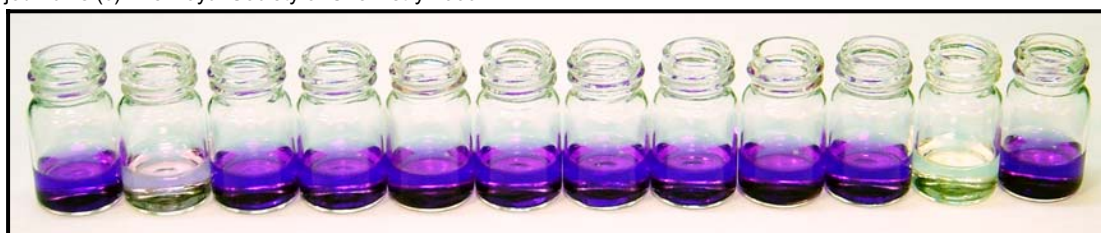

**Fig. 54.** Colour changes induced by the addition of 10 eq of different anions to a solution of receptor **4** ( $10^{-4}$  M in acetonitrile). From left to right: none,  $F^-$ ,  $Cl^-$ ,  $Br^-$ ,  $I^-$ ,  $BzO^-$ ,  $NO_3^-$ ,  $H_2PO_4^-$ ,  $HSO_4^-$ ,  $AcO^-$ ,  $CN^-$ ,  $SCN^-$ .

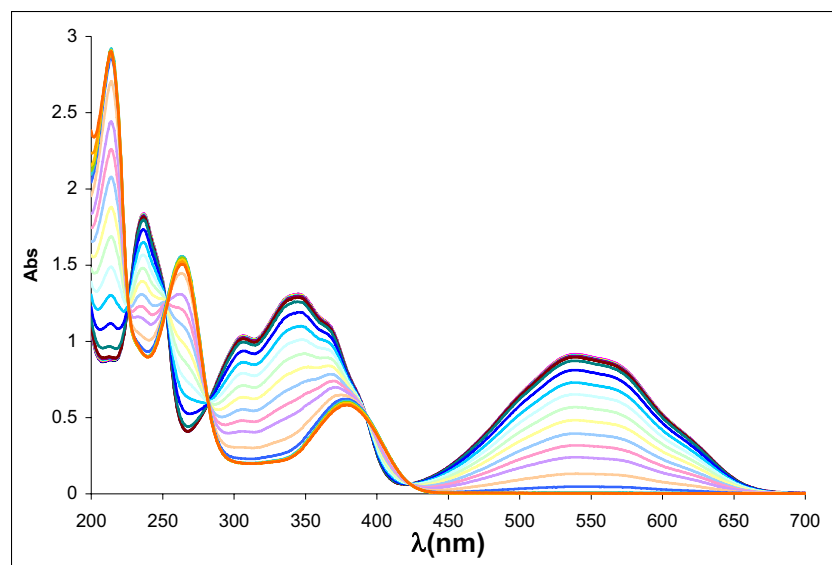

**Fig. 55.** UV titration of **4** ( $10^{-4}$  M,  $CH_3CN$ ) with  $CN^-$

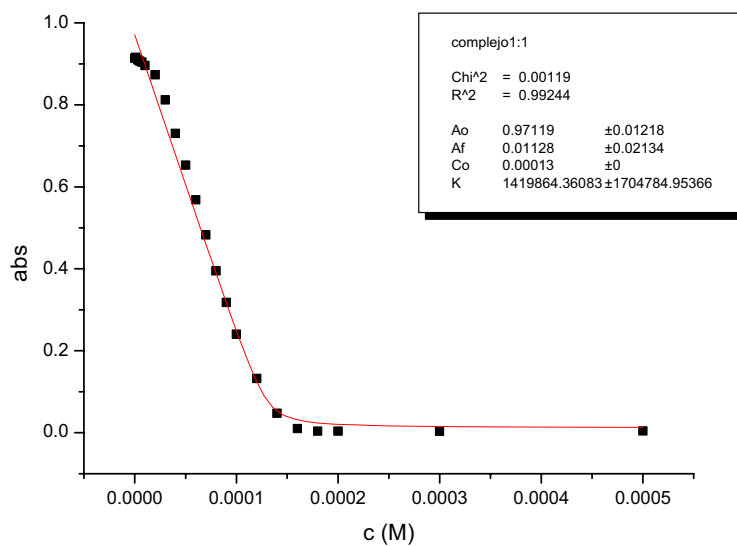

**Fig. 56.** Titration profile of **4** ( $10^{-4}$  M,  $CH_3CN$ ) with  $CN^-$

**Job's plot analysis of 4 and 9 ( $10^{-4}$  M in MeCN) with  $\text{Cu}^{2+}$  and  $\text{Hg}^{2+}$**

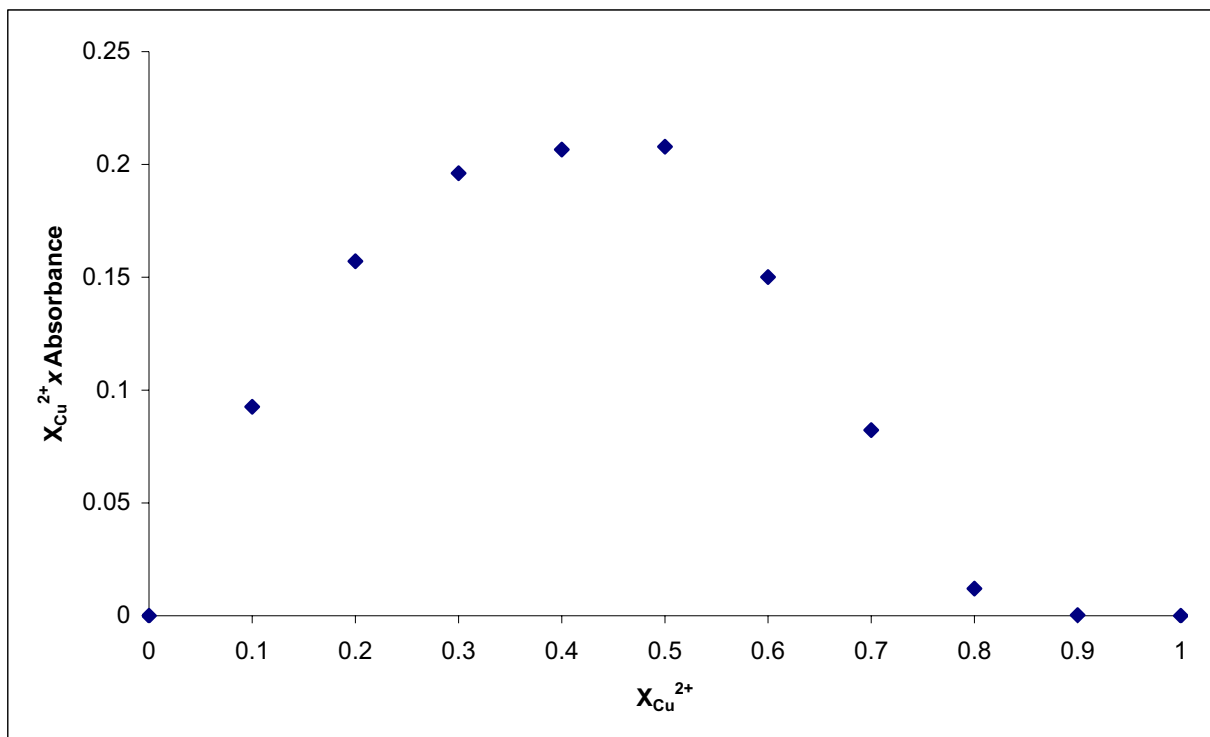

**Fig. 57.** Job plot analysis of 4 ( $10^{-4}$  M in MeCN) with  $\text{Cu}^{2+}$

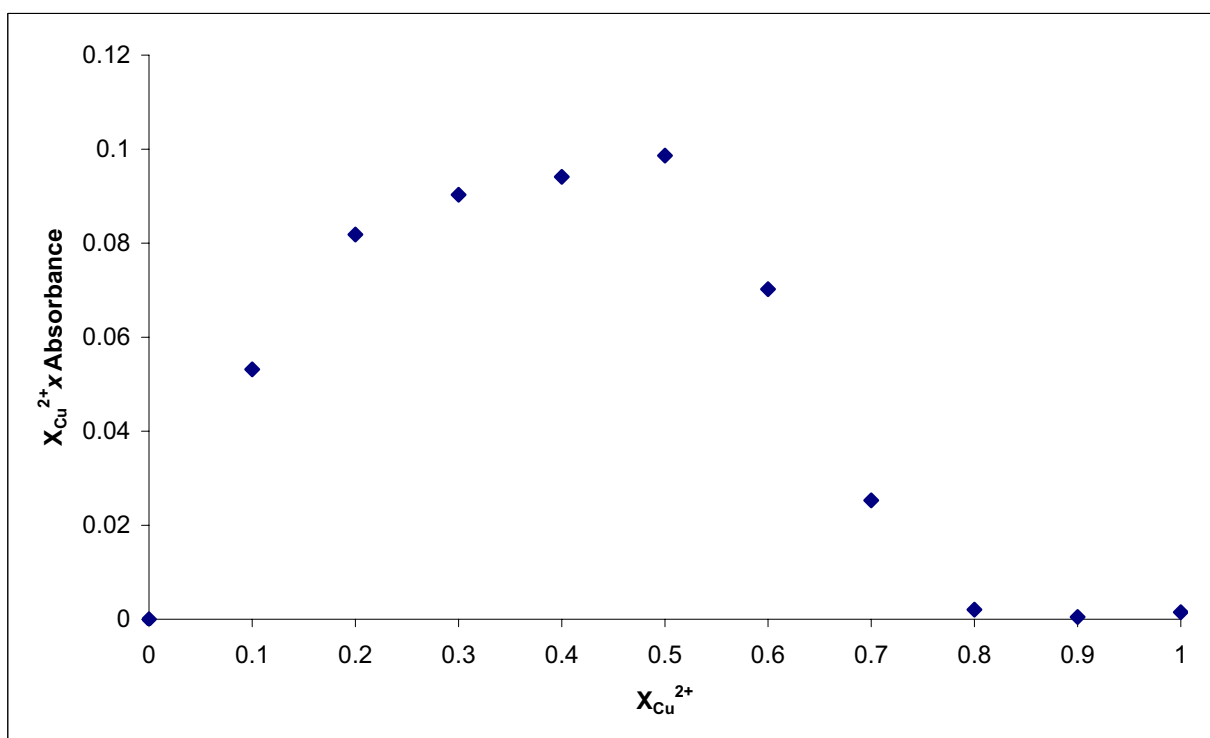

**Fig. 58.** Job's plot analysis of 9 ( $10^{-4}$  M in MeCN) with  $\text{Cu}^{2+}$

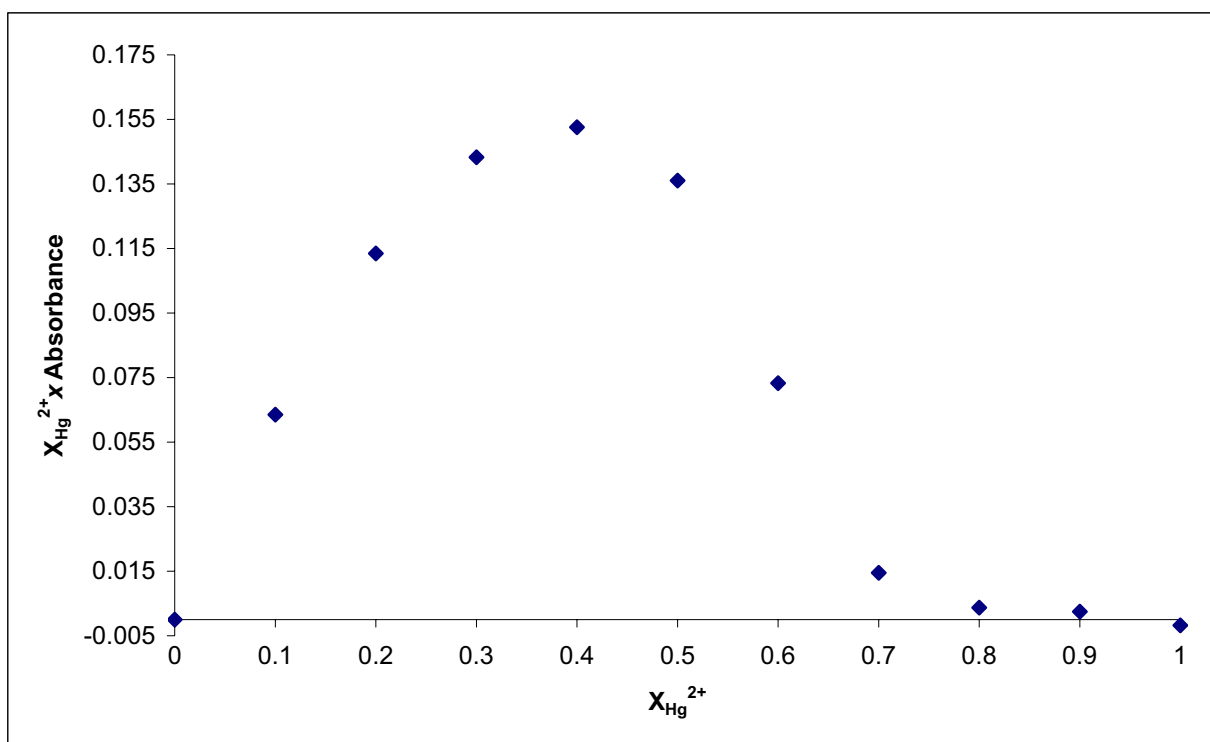

**Fig. 59.** Job's plot analysis of **9** ( $10^{-4}$  M in MeCN) with  $\text{Hg}^{2+}$

### 5. Reversibility studies:

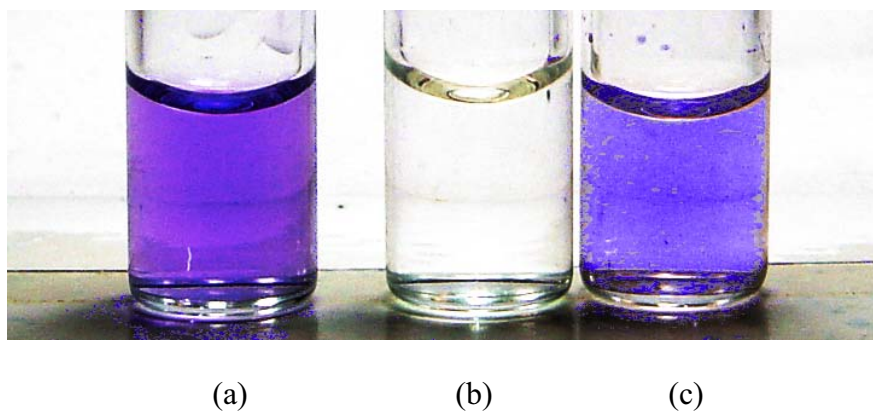

**Fig. 60.** (a) A solution of **4** ( $10^{-4}$  M in MeCN). (b) Addition of 4 eq of  $\text{Cu}^{2+} (\text{ClO}_4^-)_2$  to solution (a). (c) Addition of 2 equiv of 3,6-dioxa-1,8-octanedithiole to solution (b).

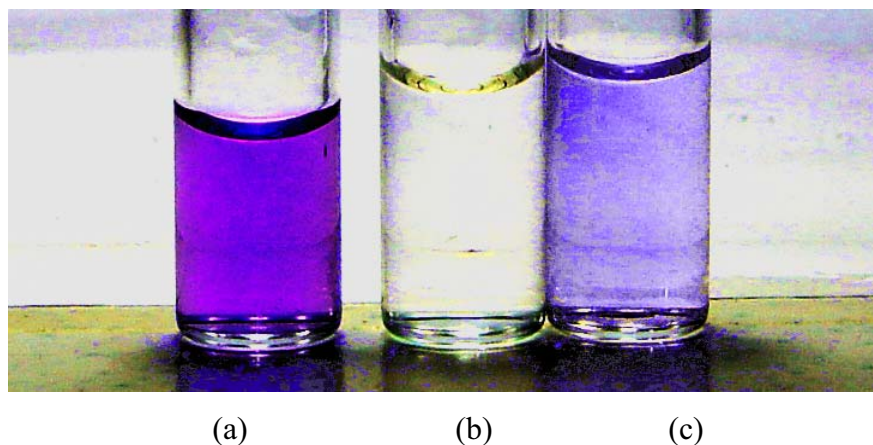

**Fig. 61.** (a) A solution of **2** ( $10^{-4}$  M in MeCN). (b) Addition of 4 eq of  $\text{CN}^- \text{Bu}_4\text{N}^+$  to solution (a). (c) Addition of 4 equiv of  $\text{Ag}^+ \text{ClO}_4^-$  to solution (b).

### MS titration experiments.

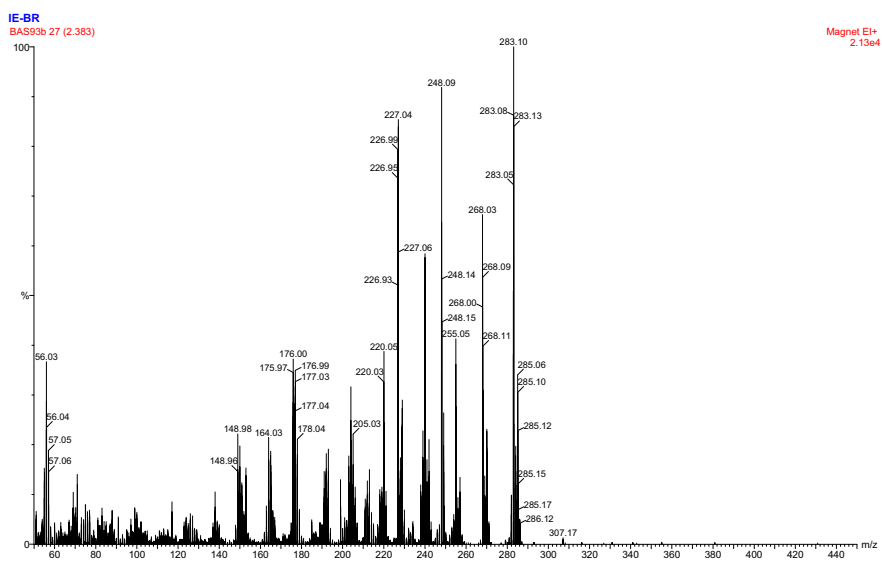

(a)

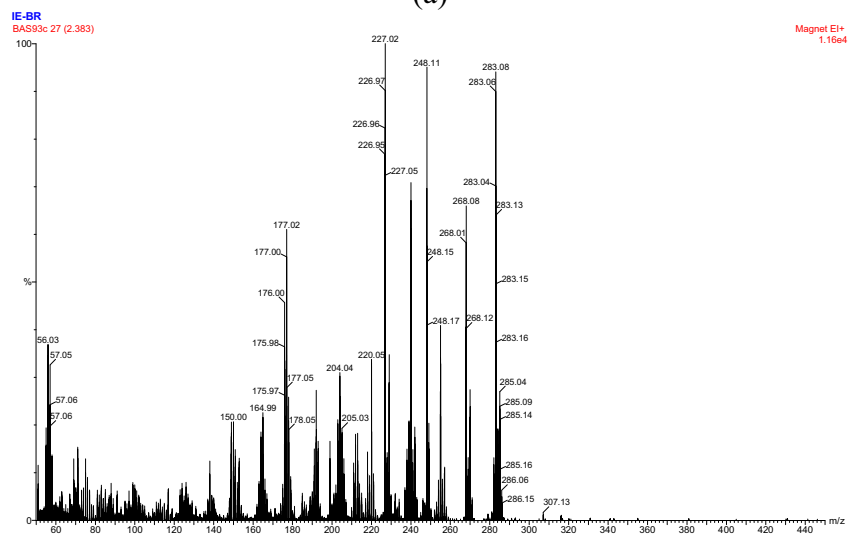

(b)

Fig. 62. (a) EIMS spectrum of **2**. (b) EIMS spectrum of **2** + 2 equiv CN<sup>-</sup>



## 6. $^1\text{H}$ NMR titration studies

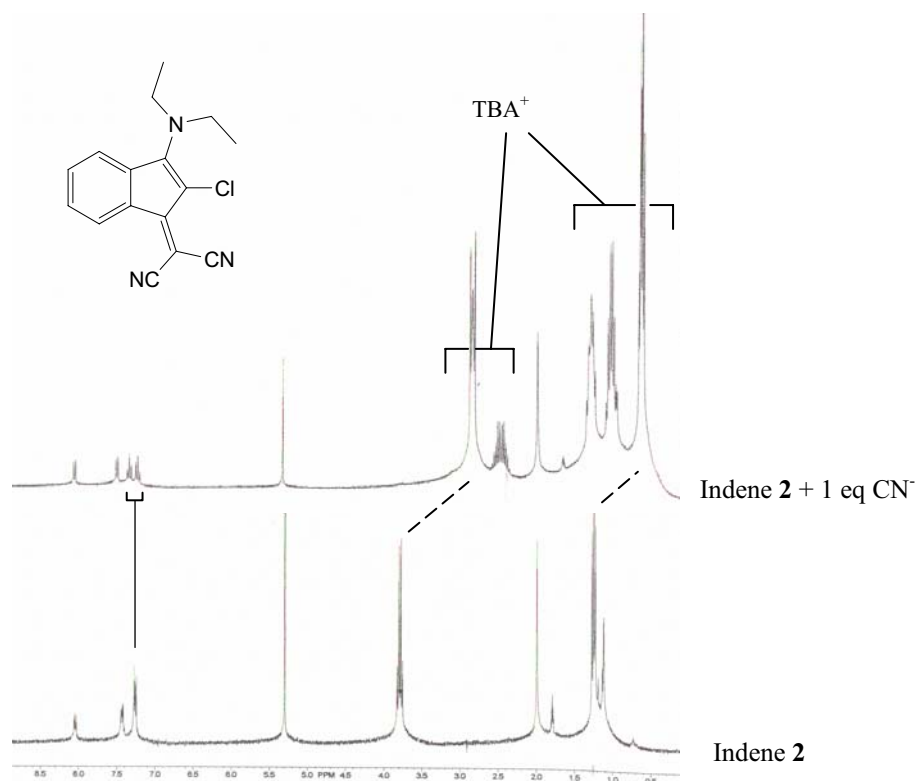

**Fig. 63.** Changes induced in the  $^1\text{H}$  NMR spectra of **2** (200 MHz, 23 mM,  $\text{CD}_3\text{CN}$ , 20°C) upon addition of 1 eq of TBA $\text{CN}$ .

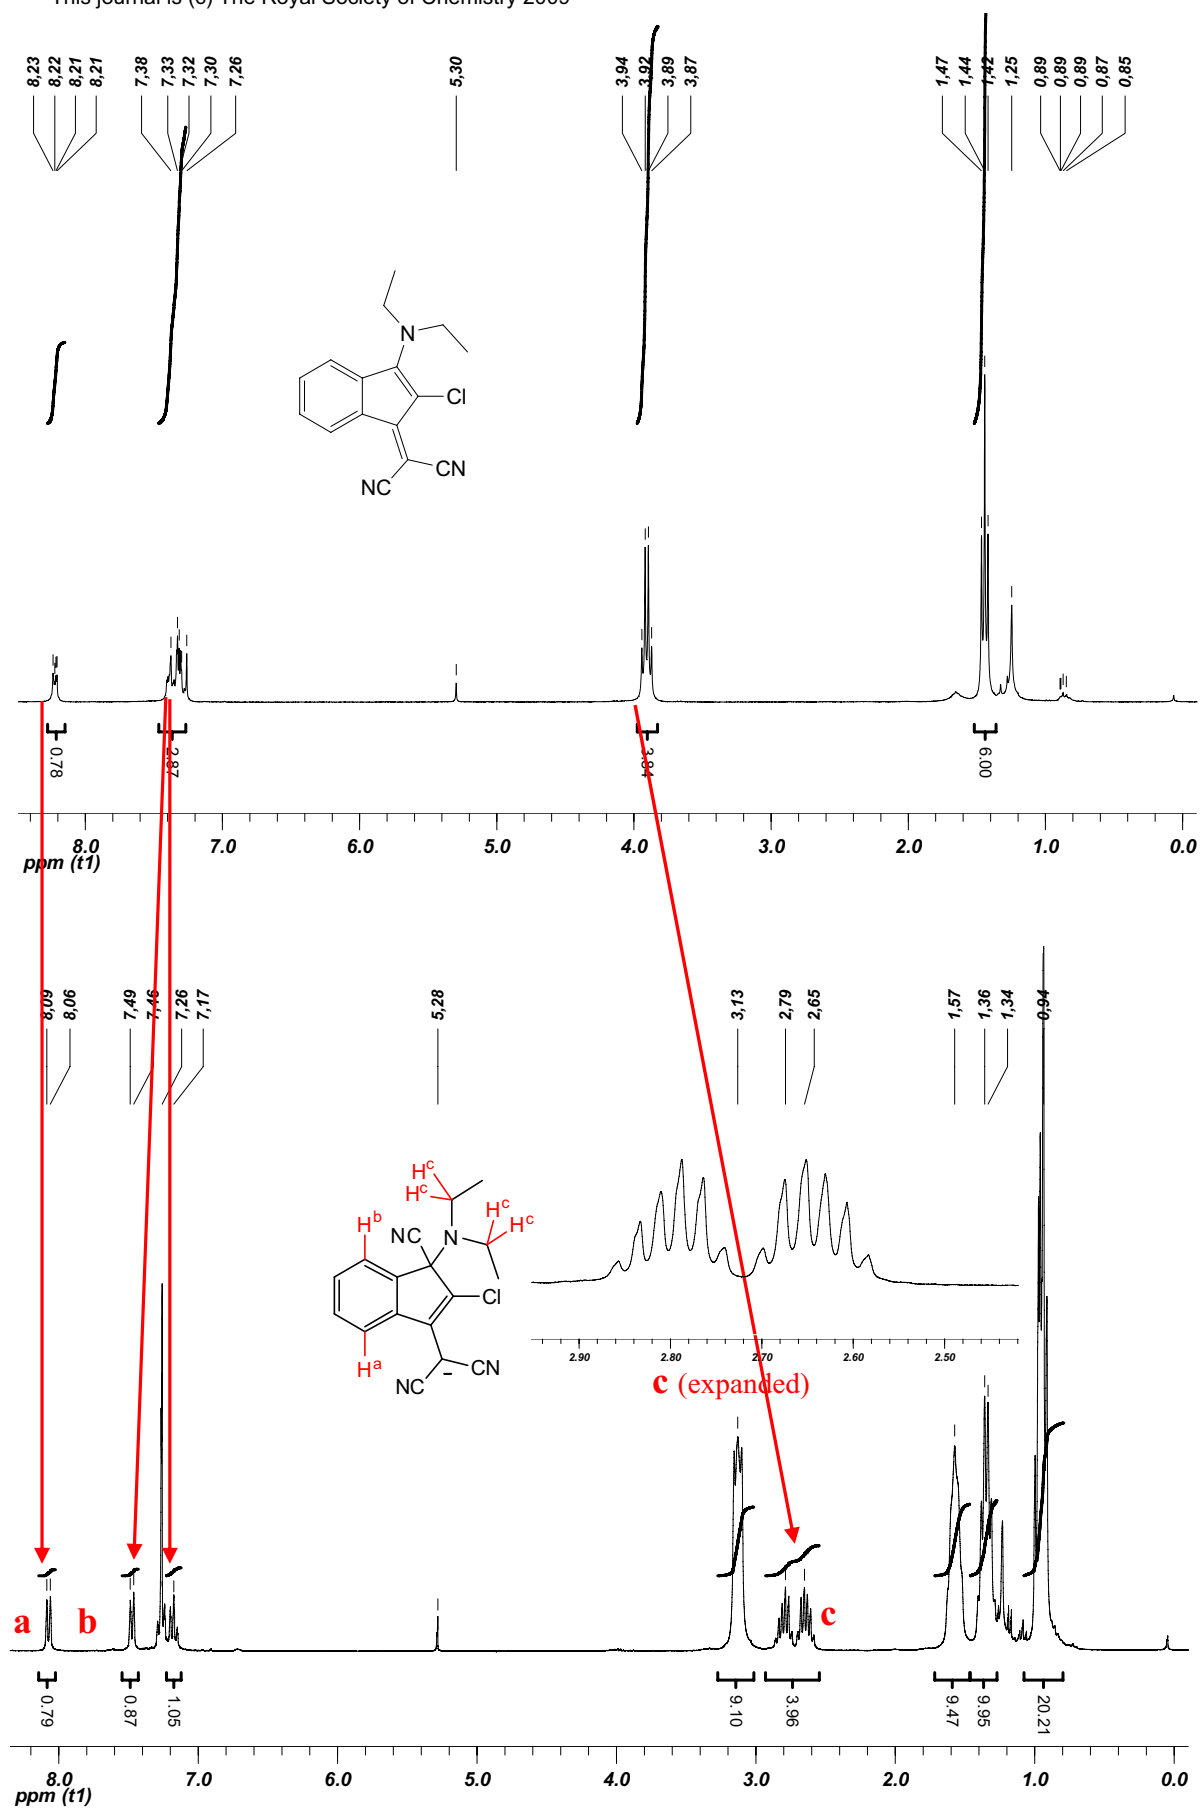

**Fig. 64.** A detailed comparison between  $^1\text{H}$  NMR spectra of **2** before and after addition of 1 equiv  $\text{CN}^-$  ( $\text{CDCl}_3$ , 300 MHz)

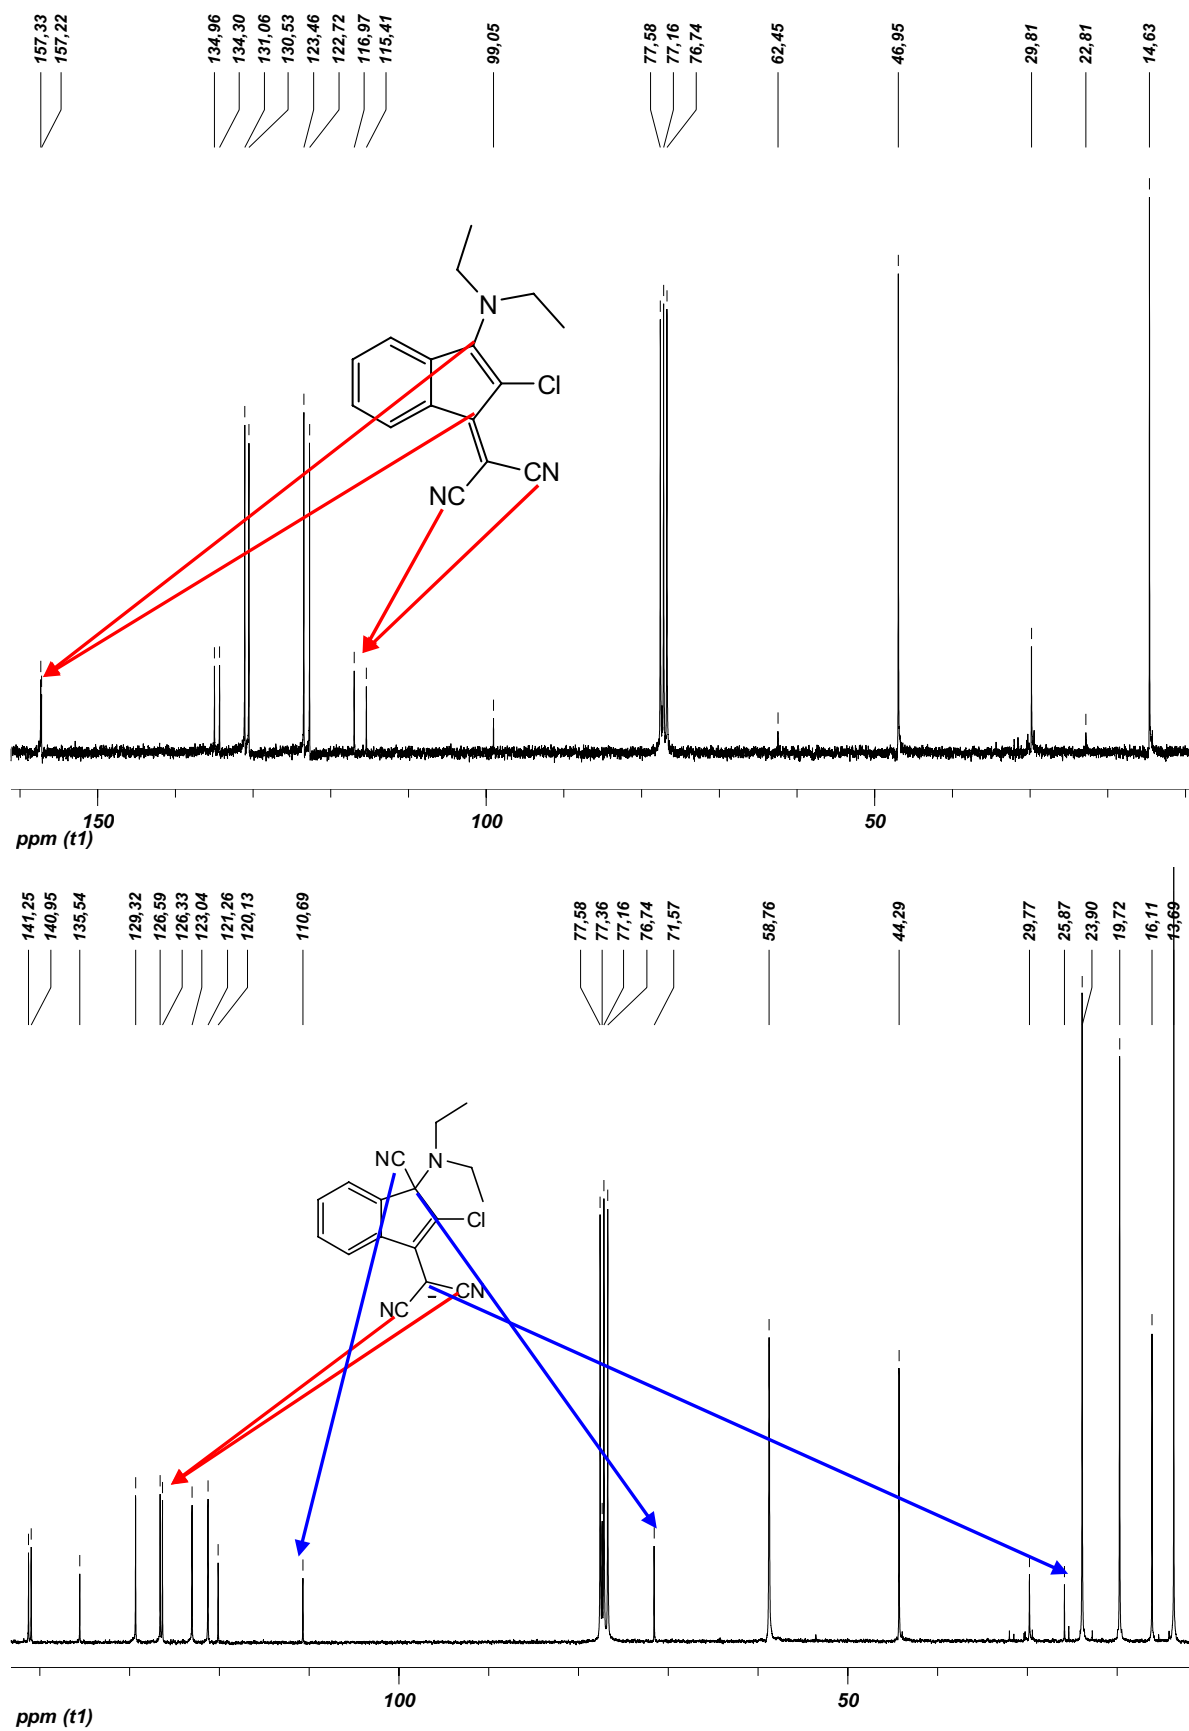

**Fig. 65.** A detailed comparison between  $^{13}\text{C}$  NMR spectra of **2** before and after addition of 1 equiv  $\text{CN}^-$  ( $\text{CDCl}_3$ , 75 MHz)

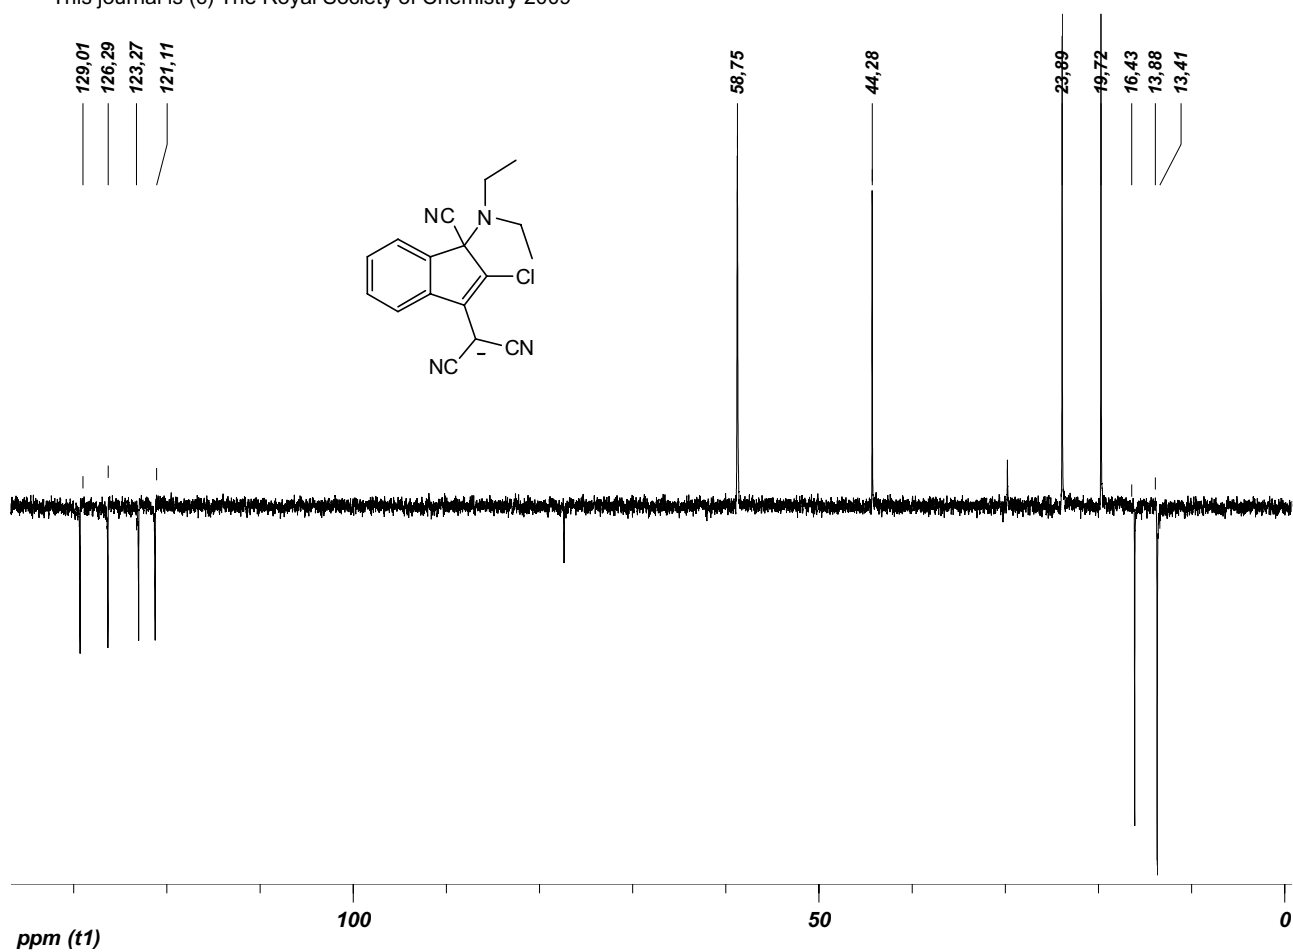

**Fig. 66.** DEPT experiment spectrum of **2** after addition of 1 equiv  $\text{CN}^-$  ( $\text{CDCl}_3$ , 75 MHz)

## 7. Kinetic studies: First order kinetics of reaction of **2** and $\text{CN}^-$

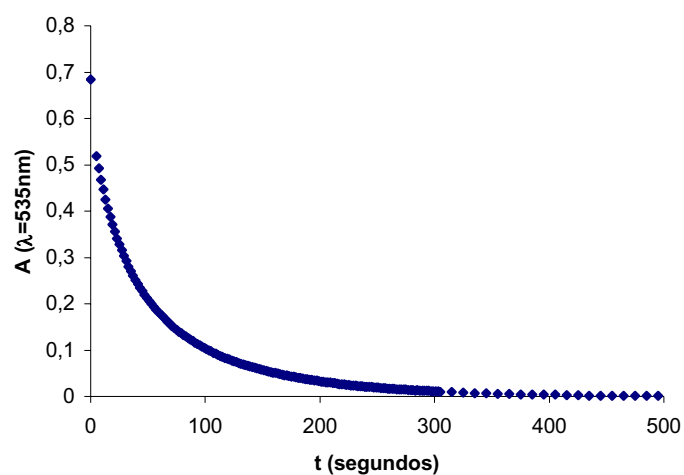

**Fig. 67.** Plot of evolution of absorbance and time of a mixture of **2** and  $\text{CN}^-$  (1:1),  $10^{-4}\text{M}$  in  $\text{CH}_3\text{CN}$

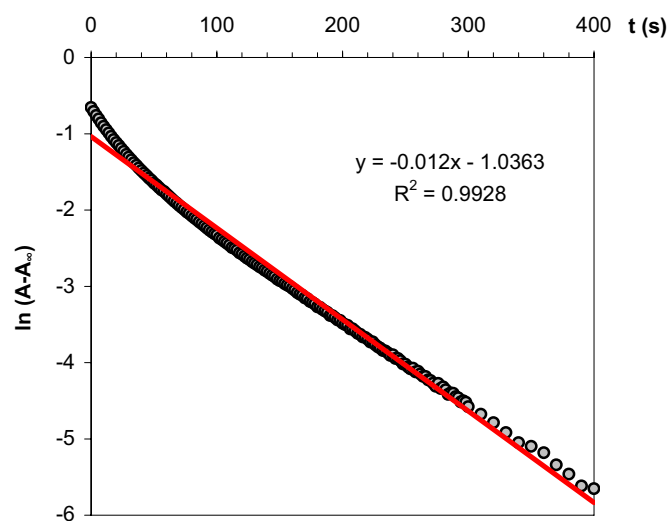

**Fig. 68.** Plot of a first order kinetics of  $\ln(A - A_{\infty})$  and  $t(\text{s})$  of a mixture of **2** and  $\text{CN}^-$  (1:1),  $10^{-4}\text{M}$  in  $\text{CH}_3\text{CN}$  that afforded the constant:  $K_v = 0.012\text{s}^{-1}$
